# Supplementary material
Source: publisher figshare collection journal article supplement (https://acs.figshare.com/ndownloader/files/4617739)
Supplement: Supplementary file 1 [file 4617739]

**Supporting Information for**

**Control of Four Stereocenters in an Organocatalytic Domino Double**

**Michael Reaction: Efficient Synthesis of Multisubstituted**

**Cyclopentanes**

Bin Tan, Zugui Shi, Pei Juan Chua, and Guofu Zhong\*

*Division of Chemistry and Biological Chemistry, School of Physical & Mathematical Sciences,  
Nanyang Technological University, 21 Nanyang Link, Singapore 637371, Singapore*

**Table of Contents**

|                                                                              |     |
|------------------------------------------------------------------------------|-----|
| 1. General Information                                                       | S2  |
| 2. Typical Procedure for Double-Michael Reactions                            | S3  |
| 3. Experimental Data of Compounds <b>3a-3o</b>                               | S4  |
| 4. <sup>1</sup> H and <sup>13</sup> C NMR Spectra for Compounds <b>3a-3o</b> | S21 |
| 5. HPLC Spectra for Compounds <b>3a-3o</b>                                   | S36 |

**General Information:** Analytical thin layer chromatography (TLC) was performed using Merck 60 F254 precoated silica gel plate (0.2 mm thickness). Subsequent to elution, plates were visualized using UV radiation (254 nm) on Spectroline Model ENF-24061/F 254 nm. Further visualization was possible by staining with basic solution of potassium permanganate or acidic solution of ceric molybdate.

Flash chromatography was performed using Merck silica gel 60 with freshly distilled solvents. Columns were typically packed as slurry and equilibrated with the appropriate solvent system prior to use.

Proton nuclear magnetic resonance spectra ( $^1\text{H}$  NMR) were recorded on Bruker AMX 400 spectrophotometer ( $\text{CDCl}_3$  as solvent). Chemical shifts for  $^1\text{H}$  NMR spectra are reported as  $\delta$  in units of parts per million (ppm) downfield from  $\text{SiMe}_4$  ( $\delta$  0.0) and relative to the signal of chloroform-d ( $\delta$  7.2600, singlet). Multiplicities were given as: s (singlet), d (doublet), t (triplet), dd (doublets of doublet) q (quartet) or m (multiplets). The number of protons (n) for a given resonance is indicated by nH. Coupling constants are reported as a *J* value in Hz. Carbon nuclear magnetic resonance spectra ( $^{13}\text{C}$  NMR) are reported as  $\delta$  in units of parts per million (ppm) downfield

from SiMe<sub>4</sub> ( $\delta$  0.0) and relative to the signal of chloroform-d ( $\delta$  77.03, triplet).

Enantioselectivities were determined by High Performance Liquid Chromatography (HPLC) analysis (Shimadzu, LC-20AD) employing a Daicel Chirapak AD-H or AS-H column or Chiralcel OD-H. Optical rotations were measured in CH<sub>2</sub>Cl<sub>2</sub> on a *Schmidt + Haensdch* polarimeter (Polartronic MH8) with a 10 cm cell (*c* given in g/100 mL).

High resolution mass spectrometry (HRMS) was recorded on Finnigan MAT 95  $\times$  P spectrometer.

**Typical Procedure for Double-Michael Reactions:** To a solution of diethyl 5-acetylhex-2-enedioate (**1a**, 0.3 mmol, 1.0 eq) and nitro olefin (0.45 mmol, 1.5 eq) in diethyl ether (0.4 mL) was added catalyst **V** (**Q-NH<sub>2</sub>**) (0.045 mmol, 0.15 eq) at room temperature (22°C). The resulting mixture was stirred vigorously for 16-36 hours. After the reaction was completed (monitored by TLC and crude NMR), the product was afforded by flash chromatography over silica gel (Et<sub>2</sub>O:Hexane = 1:10 to 1:4).

(1*R*,2*R*,3*R*,4*S*)-ethyl 4-((ethoxycarbonyl)methyl)-1-acetyl-3-nitro-2-phenylcyclopentanecarboxylate (**3a**)

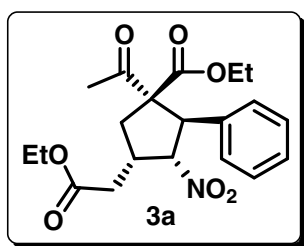

The title compound was prepared according to the typical procedure, as described above in 91% yield.

<sup>1</sup>H-NMR (400 MHz, CDCl<sub>3</sub>) δ 7.31-7.21 (m, 5H), 5.49 (dd, *J* = 5.2, 7.6 Hz, 1H), 5.10 (d, *J* = 4.8 Hz, 1H), 4.26-4.14 (m, 2H), 3.80-3.72 (m, 1H), 3.68-3.58 (m, 1H), 3.41-3.33 (m, 1H), 2.88 (dd, *J* = 6.8, 12.8 Hz, 1H), 2.50 (dd, *J* = 7.2, 16.8 Hz, 1H), 2.40 (dd, *J* = 7.6, 16.8 Hz, 1H), 2.20 (s, 3H), 2.01 (dd, *J* = 10.8, 12.8 Hz, 1H), 1.30 (t, *J* = 7.2 Hz, 3H), 0.76 (t, *J* = 7.2 Hz, 3H).

<sup>13</sup>C-NMR (100 MHz, CDCl<sub>3</sub>) δ 200.09, 170.87, 170.29, 137.16, 128.52, 128.48, 127.80, 94.26, 71.28, 61.77, 61.05, 51.54, 40.27, 37.74, 34.20, 26.98, 14.16, 13.26.

HPLC: Chiralcel OD-H (hexane / *i*-PrOH = 80 / 20, flow rate 1 mL / min, λ = 230 nm), *t*<sub>R</sub> (major) = 6.2 min, *t*<sub>R</sub> (minor) = 8.9 min; 97% ee.

[α]<sub>D</sub><sup>22</sup> = - 3.1 (*c* = 1.0, CH<sub>2</sub>Cl<sub>2</sub>).

HRMS (ESI) calcd for  $C_{20}H_{26}NO_6+H$ ,  $m/z$  392.1709, found 392.1707.

(1*R*,2*R*,3*R*,4*S*)-ethyl 4-((ethoxycarbonyl)methyl)-1-acetyl-3-nitro-2-*p*-tolylcyclopentanecarboxylate (**3b**)

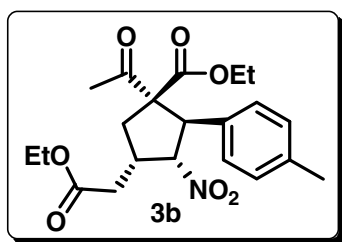

The title compound was prepared according to the typical procedure, as described above in 89% yield.

$^1H$ -NMR (400 MHz,  $CDCl_3$ )  $\delta$  7.09 (m, 4H), 5.44 (dd,  $J=5.2, 7.6$  Hz, 1H), 5.04 (d,  $J = 5.2$  Hz, 1H), 4.24-4.15 (m, 2H), 3.80-3.75 (m, 1H), 3.63-3.57 (m, 1H), 3.45-3.41 (m, 1H), 2.87 (dd,  $J = 6.8, 12.8$  Hz, 1H), 2.46 (dd,  $J = 7.2, 16.8$  Hz, 1H), 2.40 (dd,  $J = 7.6, 17.2$  Hz, 1H), 2.30 (s, 3H), 2.19 (s, 3H), 2.00 (dd,  $J = 10.8, 12.8$  Hz, 1H), 1.29 (t,  $J = 7.2$  Hz, 3H), 0.78 (t,  $J = 7.2$  Hz, 3H).

$^{13}C$ -NMR (100 MHz,  $CDCl_3$ )  $\delta$  200.25, 170.89, 170.12, 137.52, 133.97, 129.12, 128.32, 94.28, 71.13, 61.74, 61.02, 51.29, 40.04, 37.77, 34.26, 27.04, 20.99, 14.15, 13.25.

HPLC: Chiralcel OD-H (hexane / *i*-PrOH = 80 / 20, flow rate 1 mL / min,  $\lambda$  = 220 nm),  $t_R$  (major) = 6.1 min,  $t_R$  (minor) = 8.7 min; 96% ee.

$[\alpha]_D^{22} = -5.7$  ( $c = 1.3$ ,  $\text{CH}_2\text{Cl}_2$ ).

HRMS (ESI) calcd for  $\text{C}_{21}\text{H}_{27}\text{NO}_7 + \text{H}$ ,  $m/z$  406.1866, found 406.1867.

(1*R*,2*R*,3*R*,4*S*)-ethyl 4-((ethoxycarbonyl)methyl)-1-acetyl-3-nitro-2-*m*-tolylcyclopentanecarboxylate (**3c**)

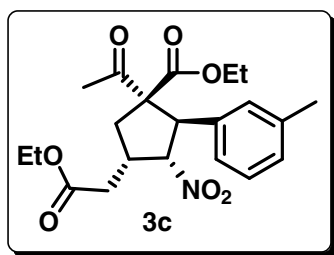

The title compound was prepared according to the typical procedure, as described above in 85% yield.

$^1\text{H}$ -NMR (400 MHz,  $\text{CDCl}_3$ )  $\delta$  7.20-7.17 (m, 1H), 7.10-6.97 (m, 3H), 5.46 (m, 1H), 5.05 (d,  $J = 5.2$  Hz, 1H), 4.24-4.16 (m, 2H), 3.80-3.72 (m, 1H), 3.64-3.58 (m, 1H), 3.45-3.36 (m, 1H), 2.87 (dd,  $J = 6.8, 12.8$  Hz, 1H), 2.48 (dd,  $J = 6.4, 17.2$  Hz, 1H), 2.36 (dd,  $J = 7.6, 16.8$  Hz, 1H), 2.32 (s, 3H), 2.19 (s, 3H), 2.00 (dd,  $J = 10.8, 12.8$  Hz, 1H), 1.30 (t,  $J = 7.2$  Hz, 3H), 0.77 (t,  $J = 7.2$  Hz, 3H).

$^{13}\text{C}$ -NMR (100 MHz,  $\text{CDCl}_3$ )  $\delta$  200.13, 170.88, 170.31, 138.13, 137.06, 129.33, 128.48, 128.41, 125.29, 94.36, 71.24, 61.71, 61.02, 51.53, 40.21, 37.77, 34.23, 26.99, 21.32, 14.16, 13.23.

HPLC: Chiralpak AD-H (hexane / *i*-PrOH = 90 / 10, flow rate 1 mL / min,  $\lambda = 210$  nm),  $t_R$  (minor) = 10.6 min,  $t_R$  (major) = 12.0 min; 94% ee.

$[\alpha]_D^{22} = -4.2$  ( $c = 1.2$ ,  $\text{CH}_2\text{Cl}_2$ ).

HRMS (ESI) calcd for  $C_{21}H_{27}NO_7+H$ ,  $m/z$  406.1866, found 406.1858.

(1*R*,2*R*,3*R*,4*S*)-ethyl 4-((ethoxycarbonyl)methyl)-1-acetyl-2-(4-methoxyphenyl)-3-nitro-cyclopentanecarboxylate (**3d**)

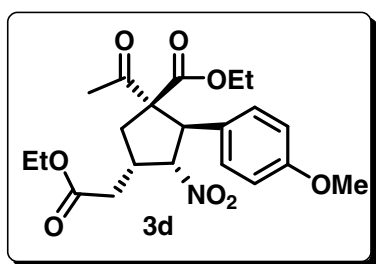

To a solution of diethyl 5-acetylhex-2-enedioate (**1a**, 0.3 mmol, 1.0 eq) and 1-methoxy-4-((*E*)-2-nitrovinyl)benzene (0.6 mmol, 2.0 eq) in diethyl ether (0.4 mL) was added catalyst **V** (**Q-NH<sub>2</sub>**) (0.06 mmol, 0.2 eq) at room temperature (22°C). The resulting mixture was stirred vigorously for 24 hours, then the reaction was continued for about 6 hours after removal of the solvent. After the reaction was completed (monitored by TLC and crude NMR), the title product was afforded by flash chromatography over silica gel (Et<sub>2</sub>O:Hexane = 1:10 to 1:3) in 83% yield.

<sup>1</sup>H-NMR (400 MHz, CDCl<sub>3</sub>)  $\delta$  7.15 (d,  $J$  = 8.8 Hz, 2H), 6.82 (d,  $J$  = 8.8, Hz, 2H), 5.44 (dd,  $J$  = 5.6, 7.6 Hz, 1H), 5.02 (d,  $J$  = 5.2 Hz, 1H), 4.24-4.15 (m, 2H), 3.83-3.76 (m, 1H), 3.78 (s, 3H), 3.63-3.57 (m, 1H), 3.51-3.43 (m, 1H), 2.86 (dd,  $J$  = 6.8, 12.8 Hz, 1H), 2.48 (dd,  $J$  = 7.6, 16.8 Hz, 1H), 2.40 (dd,  $J$  = 7.6, 16.8 Hz, 1H), 2.19 (s, 3H), 2.00 (dd,  $J$  = 10.8, 12.8 Hz, 1H), 1.30 (t,  $J$  = 7.2 Hz, 3H), 0.83 (t,  $J$  = 7.2 Hz, 3H).

$^{13}\text{C}$ -NMR (100 MHz,  $\text{CDCl}_3$ )  $\delta$  200.36, 170.90, 170.42, 159.14, 129.59, 128.96, 113.85, 94.32, 71.02, 61.77, 61.03, 55.31, 50.97, 39.88, 37.72, 34.27, 27.06, 14.15, 13.39.

HPLC: Chiralcel OD-H (hexane / *i*-PrOH = 80 / 20, flow rate 1 mL / min,  $\lambda$  = 220 nm),  $t_R$  (major) = 8.1 min,  $t_R$  (minor) = 12.2 min; 96% ee.

$[\alpha]_D^{22} = -9.0$  ( $c = 1.3$ ,  $\text{CH}_2\text{Cl}_2$ ).

HRMS (ESI) calcd for  $\text{C}_{21}\text{H}_{27}\text{NO}_8 + \text{H}$ ,  $m/z$  422.1815, found 422.1810.

(1*R*,2*R*,3*R*,4*S*)-ethyl 4-((ethoxycarbonylmethyl)-1-acetyl-2-(2-methoxyphenyl)-3-nitro-cyclopentanecarboxylate (**3e**)

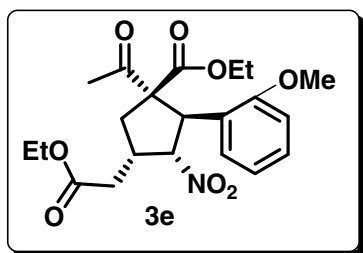

To a solution of diethyl 5-acetylhex-2-enedioate (**1a**, 0.3 mmol, 1.0 eq) and 1-methoxy-2-((*E*)-2-nitrovinyl)benzene (0.6 mmol, 2.0 eq) in diethyl ether (0.4 mL) was added catalyst **V** (**Q-NH<sub>2</sub>**) (0.06 mmol, 0.2 eq) at room temperature (22°C). The resulting mixture was stirred vigorously for 24 hours, then the reaction was continued for about 6 hours after removal of the solvent. After the reaction was completed (monitored by TLC and crude NMR), the title product was afforded by flash chromatography over silica gel ( $\text{Et}_2\text{O}$ :Hexane = 1:10 to 1:3) in 81% yield.



$^1\text{H}$ -NMR (400 MHz,  $\text{CDCl}_3$ )  $\delta$  7.30-7.21 (m, 2H), 6.90-6.89 (m, 1H), 6.78 (d,  $J = 8.0$  Hz, 1H), 5.55 (dd,  $J = 4.0, 7.2$  Hz, 1H), 5.13 (d,  $J = 4.0$  Hz, 1H), 4.21-4.13 (m, 2H), 3.90-3.84 (m, 1H), 3.77 (s, 3H), 3.65-3.59 (m, 1H), 3.53-3.45 (m, 1H), 2.89 (dd,  $J = 6.4, 12.4$  Hz, 1H), 2.48 (dd,  $J = 6.4, 17.2$  Hz, 1H), 2.34 (dd,  $J = 8.4, 16.8$  Hz, 1H), 2.14 (s, 3H), 1.95 (m, 1H), 1.28 (t,  $J = 7.2$  Hz, 3H), 0.78 (t,  $J = 7.2$  Hz, 3H).

$^{13}\text{C}$ -NMR (100 MHz,  $\text{CDCl}_3$ )  $\delta$  200.09, 171.03, 170.20, 157.31, 132.03, 129.12, 125.88, 120.85, 110.10, 94.46, 70.76, 61.39, 60.87, 54.90, 50.54, 39.78, 37.88, 34.10, 26.50, 14.19, 13.23.

HPLC: Chiralpak AD-H (hexane / *i*-PrOH = 90 / 10, flow rate 1 mL / min,  $\lambda = 210$  nm),  $t_{\text{R}}$  (minor) = 12.4 min,  $t_{\text{R}}$  (major) = 14.6 min; 95% ee.

$[\alpha]_{\text{D}}^{22} = -5.5$  ( $c = 1.0$ ,  $\text{CH}_2\text{Cl}_2$ ).

HRMS (ESI) calcd for  $\text{C}_{21}\text{H}_{27}\text{NO}_8 + \text{H}$ ,  $m/z$  422.1815, found 422.1823.

(1*R*,2*R*,3*R*,4*S*)-ethyl 4-((ethoxycarbonyl)methyl)-1-acetyl-2-(4-bromophenyl)-3-nitro-cyclopentanecarboxylate (**3f**)

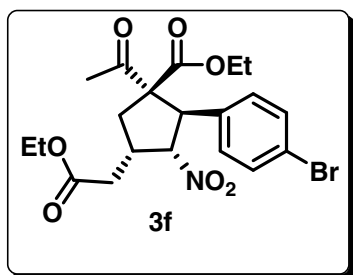

The title compound was prepared according to the typical procedure, as described above in 92% yield.

$^1\text{H}$ -NMR (400 MHz,  $\text{CDCl}_3$ )  $\delta$  7.43 (d,  $J = 8.4$  Hz, 1H), 7.11 (dd,  $J = 8.4$  Hz, 1H), 5.44 (dd,  $J = 5.6, 7.2$  Hz, 1H), 5.04 (d,  $J = 5.2$  Hz, 1H), 4.24-4.16 (m, 2H), 3.86-3.78 (m, 1H), 3.63-3.57 (m, 1H), 3.53-3.45 (m, 1H), 2.86 (dd,  $J = 6.8, 13.2$  Hz, 1H), 2.49 (dd,  $J = 7.2, 16.8$  Hz, 1H), 2.39 (dd,  $J = 7.6, 17.0$  Hz, 1H), 2.19 (s, 3H), 2.00 (dd,  $J = 10.4, 12.4$  Hz, 1H), 1.30 (t,  $J = 7.2$  Hz, 3H), 0.84 (t,  $J = 7.2$  Hz, 3H).

$^{13}\text{C}$ -NMR (100 MHz,  $\text{CDCl}_3$ )  $\delta$  199.77, 170.81, 170.12, 136.02, 131.62, 130.21, 121.94, 93.72, 70.99, 61.96, 61.10, 50.93, 39.99, 37.70, 34.17, 26.96, 14.15, 13.33.

HPLC: Chiralcel OD-H (hexane / *i*-PrOH = 80 / 20, flow rate 1 mL / min,  $\lambda = 220$  nm),  $t_{\text{R}}$  (major) = 7.6 min,  $t_{\text{R}}$  (minor) = 11.7 min; 97% ee.

$[\alpha]_{\text{D}}^{22} = -19.0$  ( $c = 0.8$ ,  $\text{CH}_2\text{Cl}_2$ ).

HRMS (ESI) calcd for  $\text{C}_{20}\text{H}_{24}\text{BrNO}_7 + \text{H}$ ,  $m/z$  470.0814, found 470.0808.

(1*R*,2*R*,3*R*,4*S*)-ethyl 4-((ethoxycarbonyl)methyl)-1-acetyl-2-(4-chlorophenyl)-3-nitro-cyclopentanecarboxylate (**3g**)

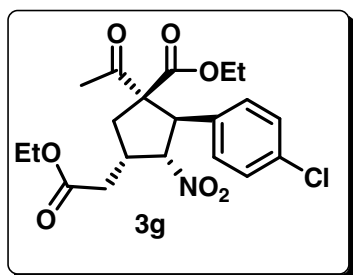

The title compound was prepared according to the typical procedure, as described above in 88% yield.

$^1\text{H}$ -NMR (400 MHz,  $\text{CDCl}_3$ )  $\delta$  7.28 (d,  $J = 6.8$  Hz, 1H), 7.16 (dd,  $J = 2.0$ , 7.8 Hz, 1H), 5.44 (dd,  $J = 5.6$ , 7.6 Hz, 1H), 5.05 (d,  $J = 5.2$  Hz, 1H), 4.24-4.16 (m, 2H), 3.86-3.78 (m, 1H), 3.64-3.57 (m, 1H), 3.52-3.44 (m, 1H), 2.86 (dd,  $J = 6.8$ , 12.8 Hz, 1H), 2.48 (dd,  $J = 7.4$ , 17.0 Hz, 1H), 2.39 (dd,  $J = 7.6$ , 17.0 Hz, 1H), 2.19 (s, 3H), 2.00 (dd,  $J = 10.4$ , 12.4 Hz, 1H), 1.30 (t,  $J = 7.2$  Hz, 3H), 0.84 (t,  $J = 7.2$  Hz, 3H).

$^{13}\text{C}$ -NMR (100 MHz,  $\text{CDCl}_3$ )  $\delta$  200.03, 170.81, 170.14, 135.49, 133.82, 129.88, 128.64, 93.79, 71.02, 61.92, 61.09, 50.86, 39.97, 37.70, 34.17, 26.97, 14.15, 13.33.

HPLC: Chiralcel OD-H (hexane / *i*-PrOH = 80 / 20, flow rate 1 mL / min,  $\lambda = 254$  nm),  $t_{\text{R}}$  (major) = 7.1 min,  $t_{\text{R}}$  (minor) = 11.1 min; 96% ee.

$[\alpha]_{\text{D}}^{22} = -11.4$  ( $c = 1.0$ ,  $\text{CH}_2\text{Cl}_2$ ).

HRMS (ESI) calcd for  $\text{C}_{20}\text{H}_{24}\text{ClNO}_7 + \text{H}$ ,  $m/z$  426.1320, found 426.1322.

(1*R*,2*R*,3*R*,4*S*)-ethyl 4-((ethoxycarbonyl)methyl)-1-acetyl-2-(naphthalen-3-yl)-3-nitro-cyclopentanecarboxylate (**3h**)

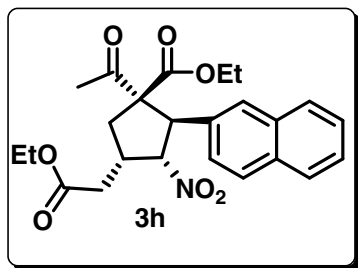

The title compound was prepared according to the typical procedure, as described above in 84% yield.

$^1\text{H-NMR}$  (400 MHz,  $\text{CDCl}_3$ )  $\delta$  7.82-7.76 (m, 3H), 7.69 (s, 1H), 7.49-7.47(m, 2H), 7.34 (d,  $J = 8.4$  Hz, 1H), 5.64-5.61 (m, 1H), 5.27 (d,  $J = 5.2$  Hz, 1H), 4.26-4.18(m, 2H), 3.75-3.63 (m, 2H), 3.26-3.18 (m, 1H), 2.93 (dd,  $J = 6.8, 12.8$  Hz, 1H), 2.53 (dd,  $J = 7.6, 16.8$  Hz, 1H), 2.45 (dd,  $J = 7.6, 16.8$  Hz, 1H), 2.21 (s, 3H), 2.45 (dd,  $J = 10.8, 12.8$  Hz, 1H), 1.32 (t,  $J = 7.2$  Hz, 3H), 0.52 (t,  $J = 7.2$  Hz, 3H).

$^{13}\text{C-NMR}$  (100 MHz,  $\text{CDCl}_3$ )  $\delta$  200.22, 170.91, 170.32, 128.17, 127.89, 127.48, 127.43, 126.40, 126.28, 126.26, 94.23, 71/30, 61.74, 61.08, 51.71, 40.19, 37.86, 34.29, 27.02, 14.18, 13.03.

HPLC: Chiralpak AD-H (hexane / *i*-PrOH = 80 / 20, flow rate 1 mL / min,  $\lambda = 254$  nm),  $t_{\text{R}}$  (minor) = 20.5 min,  $t_{\text{R}}$  (major) = 33.5 min; 95% ee.

$[\alpha]_{\text{D}}^{22} = -31.9$  ( $c = 0.6$ ,  $\text{CH}_2\text{Cl}_2$ ).

HRMS (ESI) calcd for  $\text{C}_{24}\text{H}_{27}\text{NO}_7 + \text{H}$ ,  $m/z$  442.1866, found 442.1861.

(1*R*,2*R*,3*R*,4*S*)-ethyl 4-((ethoxycarbonyl)methyl)-1-acetyl-2-(naphthalen-1-yl)-3-nitro-cyclopentanecarboxylate (**3i**)

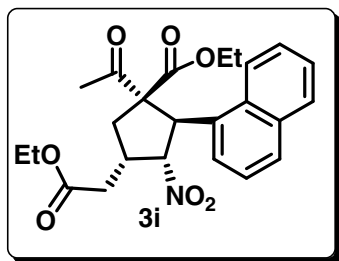

The title compound was prepared according to the typical procedure, as described above in 87% yield.

$^1\text{H-NMR}$  (400 MHz,  $\text{CDCl}_3$ )  $\delta$  8.58 (d,  $J = 7.6$  Hz, 1H), 7.82 (d,  $J = 8.4$  Hz, 1H), 7.77 (d,  $J = 8.4$  Hz, 1H), 7.62-7.59 (m, 1H), 7.52-7.49 (m, 1H), 7.44-7.40(m, 1H), 7.23 (d,  $J = 7.2$  Hz, 1H), 6.03 (d,  $J = 2.4$  Hz, 1H), 5.60-5.58 (m, 1H), 4.30-4.17(m, 2H), 3.76-3.68 (m, 1H), 3.51-3.45 (m, 1H), 3.01 (dd,  $J = 6.8, 12.8$  Hz, 1H), 2.88-2.83 (m, 1H), 2.62 (dd,  $J = 6.4, 17.2$  Hz, 1H), 2.43 (dd,  $J = 8.4, 17.2$  Hz, 1H), 2.19 (s, 3H), 1.16-2.10 (m, 1H), 1.32 (t,  $J = 7.2$  Hz, 3H), 0.19 (t,  $J = 7.2$  Hz, 3H).

$^{13}\text{C-NMR}$  (100 MHz,  $\text{CDCl}_3$ )  $\delta$  199.62, 170.91, 170.19, 135.23, 133.55, 132.51, 128.57, 126.75, 126.04, 124.99, 124.75, 124.57, 96.98, 72.47, 61.48, 61.11, 46.43, 37.98, 33.91, 26.81, 14.19, 12.51.

HPLC: Chiralcel OD-H (hexane / *i*-PrOH = 80 / 20, flow rate 1 mL / min,  $\lambda = 220$  nm),  $t_R$  (major) = 7.7 min,  $t_R$  (minor) = 10.2 min; 95% ee.

$[\alpha]_D^{22} = -29.0$  ( $c = 1.0$ ,  $\text{CH}_2\text{Cl}_2$ ).

HRMS (ESI) calcd for  $\text{C}_{24}\text{H}_{27}\text{NO}_7 + \text{H}$ ,  $m/z$  442.1866, found 442.1861.

(1*R*,2*R*,3*R*,4*S*)-ethyl 4-((ethoxycarbonyl)methyl)-1-acetyl-2-(furan-3-yl) 3-nitro-cyclopentanecarboxylate (**3j**)

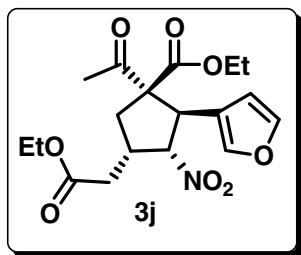

The title compound was prepared according to the typical procedure, as described above in 86% yield.

$^1\text{H-NMR}$  (400 MHz,  $\text{CDCl}_3$ )  $\delta$  7.36-7.34 (m, 2H), 6.28 (s, 1H), 5.34-5.31(m, 1H), 4.82 (d,  $J = 6.8$  Hz, 1H), 4.22-4.14(m, 2H), 4.03-3.95 (m, 1H), 3.88-3.81 (m, 1H), 3.58-3.52 (m, 1H), 2.83 (dd,  $J = 7.2, 13.2$  Hz, 1H), 2.41 (d,  $J = 7.6$  Hz, 1H), 2.21 (s, 3H), 1.96 (dd,  $J = 10.4, 12.8$  Hz, 1H), 1.28 (t,  $J = 7.2$  Hz, 3H), 1.02 (t,  $J = 7.2$  Hz, 3H).

$^{13}\text{C-NMR}$  (100 MHz,  $\text{CDCl}_3$ )  $\delta$  200.61, 170.86, 170.57, 143.15, 140.79, 120.66, 109.98, 93.37, 69.47, 61.91, 61.04, 43.71, 38.29, 37.85, 34.55, 27.21, 14.14, 13.48.

HPLC: Chiralpak AD-H (hexane / *i*-PrOH = 90 / 10, flow rate 1 mL / min,  $\lambda = 254$  nm),  $t_{\text{R}}$  (minor) = 17.9 min,  $t_{\text{R}}$  (major) = 19.0 min; 94% ee.

$[\alpha]_{\text{D}}^{22} = 5.7$  ( $c = 1.2$ ,  $\text{CH}_2\text{Cl}_2$ ).

HRMS (ESI) calcd for  $\text{C}_{18}\text{H}_{23}\text{NO}_8 + \text{H}$ ,  $m/z$  382.1502, found 382.1499.

(1*R*,2*R*,3*R*,4*S*)-ethyl 4-((ethoxycarbonyl)methyl)-1-acetyl-2-(furan-2-yl) 3-nitro-cyclopentanecarboxylate (**3k**)

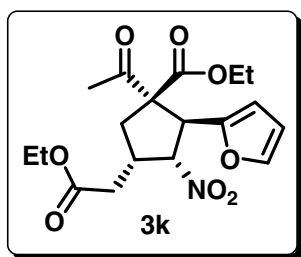

The title compound was prepared according to the typical procedure, as described above in 87% yield.

$^1\text{H-NMR}$  (400 MHz,  $\text{CDCl}_3$ )  $\delta$  7.31-7.28 (m, 1H), 6.31-6.26 (m, 2H), 5.45 (dd,  $J = 5.6, 7.6$  Hz, 1H), 5.09 (d,  $J = 5.6$  Hz, 1H), 4.22-4.15(m, 2H),

4.04-3.99 (m, 1H), 3.80-3.75 (m, 1H), 3.60-3.53 (m, 1H), 2.88 (dd,  $J = 6.8$ , 13.2 Hz, 1H), 2.41 (d,  $J = 7.6$  Hz, 1H), 2.20 (s, 3H), 1.96-1.90 (m, 1H), 1.28 (t,  $J = 7.2$  Hz, 3H), 1.03 (t,  $J = 7.2$  Hz, 3H).

$^{13}\text{C}$ -NMR (100 MHz,  $\text{CDCl}_3$ )  $\delta$  199.80, 170.76, 169.98, 149.81, 142.32, 110.73, 108.96, 92.07, 69.40, 62.32, 61.03, 46.32, 38.99, 37.50, 34.29, 26.73, 14.14, 13.60.

HPLC: Chiralcel OD-H (hexane / *i*-PrOH = 80 / 20, flow rate 1 mL / min,  $\lambda = 220$  nm),  $t_R$  (major) = 7.2 min,  $t_R$  (minor) = 11.1 min; 94% ee.

$[\alpha]_D^{22} = -6.3$  ( $c = 1.1$ ,  $\text{CH}_2\text{Cl}_2$ ).

HRMS (ESI) calcd for  $\text{C}_{18}\text{H}_{23}\text{NO}_8 + \text{Na}$ ,  $m/z$  404.1321, found 404.1326.

(1*R*,2*R*,3*R*,4*S*) –ethyl 4-((ethoxycarbonyl)methyl)-1-acetyl-3-nitro-2-(thiophen-2-yl)cyclopentanecarboxylate (**3l**)

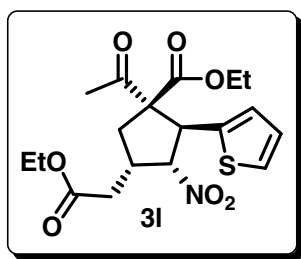

The title compound was prepared according to the typical procedure, as described above in 91% yield.

$^1\text{H}$ -NMR (400 MHz,  $\text{CDCl}_3$ )  $\delta$  7.21-7.20 (m, 1H), 6.93-6.92 (m, 2H), 5.52-4.48 (m, 1H), 5.21 (d,  $J = 7.2$  Hz, 1H), 4.226-4.14 (m, 2H), 3.96-3.89 (m, 1H), 3.75-3.68 (m, 1H), 3.66-3.57 (m, 1H), 2.89 (dd,  $J = 7.2$ , 12.8 Hz,

1H), 2.41 (d,  $J = 7.6$  Hz, 1H), 2.21 (s, 3H), 1.96 (dd,  $J = 10.0, 13.2$  Hz, 1H), 1.29 (t,  $J = 7.2$  Hz, 3H), 0.94 (t,  $J = 7.2$  Hz, 3H).

$^{13}\text{C}$ -NMR (100 MHz,  $\text{CDCl}_3$ )  $\delta$  200.36, 170.76, 170.21, 138.64, 126.82, 126.27, 125.36, 94.23, 70.46, 62.10, 61.07, 47.35, 38.31, 37.70, 34.55, 27.14, 14.15, 13.48.

HPLC: Chiralpak AS-H (hexane / *i*-PrOH = 95 / 5, flow rate 1 mL / min,  $\lambda = 210$  nm),  $t_{\text{R}}$  (minor) = 25.0 min,  $t_{\text{R}}$  (major) = 28.1 min; 94% ee.

$[\alpha]_{\text{D}}^{22} = -4.3$  ( $c = 1.2$ ,  $\text{CH}_2\text{Cl}_2$ ).

HRMS (ESI) calcd for  $\text{C}_{18}\text{H}_{23}\text{NO}_7\text{S}+\text{Na}$ ,  $m/z$  420.1093, found 420.1100.

(1*R*,2*R*,3*R*,4*S*)-ethyl 4-((ethoxycarbonyl)methyl)-1-acetyl-3-nitro-2-(4-nitrophenyl) cyclopentanecarboxylate (**3m**)

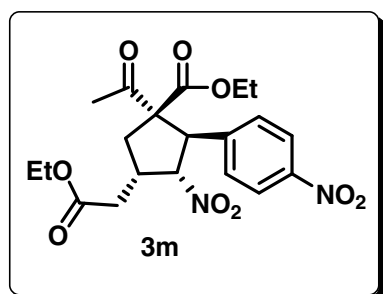

To a solution of diethyl 5-acetylhex-2-enedioate (**1a**, 0.3 mmol, 1.0 eq) and 1-nitro-4-((*E*)-2-nitrovinyl)benzene (0.6 mmol, 2.0 eq) in diethyl ether (0.4 mL) was added catalyst **V** (**Q-NH<sub>2</sub>**) (0.06 mmol, 0.2 eq) at room temperature (22°C). The resulting mixture was stirred vigorously for 24 hours, then the reaction was continued for about 6 hours after removal of the solvent. After the reaction was completed (monitored by TLC and



crude NMR), the title product was afforded by flash chromatography over silica gel (Et<sub>2</sub>O:Hexane = 1:10 to 1:3) in 81% yield.

<sup>1</sup>H-NMR (400 MHz, CDCl<sub>3</sub>) δ 8.17 (d, *J* = 8.8 Hz, 1H), 7.44 (d, *J* = 8.8 Hz, 1H), 5.52-5.49 (m, 1H), 5.19 (d, *J* = 5.6 Hz, 1H), 4.25-4.16 (m, 2H), 3.86-3.80 (m, 1H), 3.69-3.62 (m, 1H), 3.49-3.43 (m, 1H), 2.89 (dd, *J* = 6.8, 13.2 Hz, 1H), 2.51 (dd, *J* = 7.2, 17.2 Hz, 1H), 2.40 (dd, *J* = 7.6, 17.2 Hz, 1H), 2.22 (s, 3H), 2.02 (dd, *J* = 10.8, 12.8 Hz, 1H), 1.30 (t, *J* = 7.2 Hz, 3H), 0.82 (t, *J* = 7.2 Hz, 3H).

<sup>13</sup>C-NMR (100 MHz, CDCl<sub>3</sub>) δ 199.79, 170.73, 169.82, 147.41, 144.35, 129.64, 123.60, 93.20, 71.10, 62.07, 61.21, 51.02, 40.01, 37.73, 34.09, 26.91, 14.15, 13.42.

HPLC: Chiralpak AS-H (hexane / *i*-PrOH = 80 / 20, flow rate 1 mL / min, λ = 210 nm), *t*<sub>R</sub> (major) = 20.9 min, *t*<sub>R</sub> (minor) = 25.4 min; 97% ee.

[α]<sub>D</sub><sup>22</sup> = - 9.7 (*c* = 1.0, CH<sub>2</sub>Cl<sub>2</sub>).

(1*R*,2*R*,3*R*,4*S*)-benzyl 4-((ethoxycarbonyl)methyl)-1-acetyl-3-nitro-2-phenylcyclopentanecarboxylate (**3n**)

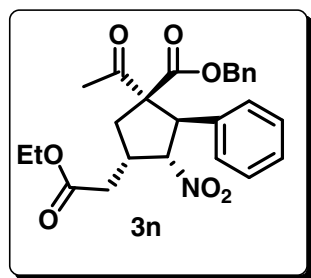

To a solution of 6-benzyl 1-ethyl 5-acetylhex-2-enedioate **1b** (0.3 mmol, 1.0 eq) and 1-((*E*)-2-nitrovinyl)benzene (0.45 mmol, 1.5 eq) in diethyl

ether (0.4 mL) was added catalyst **V** (**Q-NH<sub>2</sub>**) (0.045 mmol, 0.15 eq) at room temperature (22°C). The resulting mixture was stirred vigorously for 16 hours, then the reaction was continued for about 6 hours after removal of the solvent. After the reaction was completed (monitored by TLC and crude NMR), the title product was afforded by flash chromatography over silica gel (Ethyl acetate:Hexane = 1:10 to 1:4) in 91 % yield.

<sup>1</sup>H-NMR (400 MHz, CDCl<sub>3</sub>) δ 7.54-7.14 (m, 8H), 6.96-6.94 (m, 2H), 5.51 (dd, *J* = 5.2, 7.2 Hz, 1H), 5.11 (d, *J* = 5.2 Hz, 1H), 4.83 (d, *J* = 12.0 Hz, 1H), 4.25-4.16 (m, 2H), 4.10 (d, *J* = 12.0 Hz, 1H), 3.69-3.63 (m, 1H), 2.89 (dd, *J* = 6.8, 13.2 Hz, 1H), 2.49 (dd, *J* = 7.6, 16.8 Hz, 1H), 2.40 (dd, *J* = 7.6, 16.8 Hz, 1H), 2.11 (s, 3H), 2.02 (dd, *J* = 10.8, 12.8 Hz, 1H), 1.30 (t, *J* = 7.2 Hz, 3H).

<sup>13</sup>C-NMR (100 MHz, CDCl<sub>3</sub>) δ 199.84, 170.86, 170.18, 137.04, 134.09, 128.63, 128.49, 128.45, 128.28, 127.91, 94.23, 71.41, 67.57, 61.07, 51.69, 40.20, 37.81, 34.22, 27.07, 14.17.

HPLC: Chiralcel OD-H (hexane / *i*-PrOH = 80 / 20, flow rate 1 mL / min, λ = 220 nm), *t<sub>R</sub>* (major) = 7.7 min, *t<sub>R</sub>* (minor) = 11.5 min; 97% ee.

[α]<sub>D</sub><sup>22</sup> = - 5.0 (*c* = 0.9, CH<sub>2</sub>Cl<sub>2</sub>).

HRMS (ESI) calcd for C<sub>25</sub>H<sub>27</sub>NO<sub>7</sub>+H, *m/z* 454.1866, found 454.1861.

(1*R*,2*R*,3*R*,4*S*)-benzyl 4-((ethoxycarbonyl)methyl)-1-acetyl-3-nitro-2-styrylcyclopentanecarboxylate (**3o**)

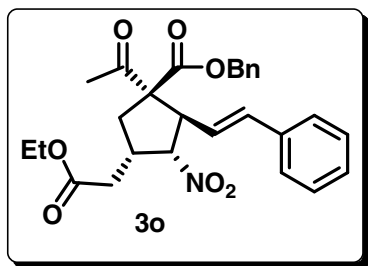

To a solution of 6-benzyl 1-ethyl 5-acetylhex-2-enedioate (**1b**, 0.3 mmol, 1.0 eq) and 1-((1*E*,3*E*)-4-nitrobuta-1,3-dienyl)benzene (0.6 mmol, 2.0 eq) in diethyl ether (0.4 mL) was added catalyst **V** (**Q-NH<sub>2</sub>**) (0.03 mmol, 0.2 eq) at room temperature (22°C). The resulting mixture was stirred vigorously for 24 hours, and then the reaction was continued for about 6 hours after removal of the solvent. After the reaction was completed (monitored by TLC and crude NMR), the title product was afforded by flash chromatography over silica gel (Et<sub>2</sub>O:Hexane = 1:10 to 1:4) in 83% yield.

<sup>1</sup>H-NMR (400 MHz, CDCl<sub>3</sub>) δ 7.32-7.22 (m, 10H), 6.55 (d, *J* = 16.0, 1H), 6.05 (dd, *J* = 8.8, 16.0 Hz, 1H), 5.21-5.17 (m, 1H), 5.18 (d, *J* = 12.0 Hz, 1H), 5.05 (d, *J* = 12.0 Hz, 1H), 4.08 (d, *J* = 12.4 Hz, 1H), 4.26-4.13 (m, 3H), 3.45-3.35 (m, 1H), 2.72 (dd, *J* = 7.2, 13.2 Hz, 1H), 2.43-2.40 (m, 2H), 2.18 (s, 3H), 2.07 (dd, *J* = 10.8, 13.2 Hz, 1H), 1.28 (t, *J* = 7.2 Hz, 3H).

<sup>13</sup>C-NMR (100 MHz, CDCl<sub>3</sub>) δ 200.66, 170.89, 170.50, 135.91, 135.07, 134.36, 128.75, 128.73, 128.62, 128.60, 128.13, 126.55, 123.69, 92.81, 69.04, 67.85, 61.03, 51.55, 38.04, 37.63, 34.59, 27.64, 14.15.

HPLC: Chiralpak AD-H (hexane / *i*-PrOH = 90 / 10, flow rate 1 mL / min, λ = 254 nm), *t<sub>R</sub>* (major) = 20.7 min, *t<sub>R</sub>* (minor) = 22.8 min; 95% ee.

$[\alpha]_{\text{D}}^{22} = -5.3$  ( $c = 1.0$ ,  $\text{CH}_2\text{Cl}_2$ ).

HRMS (ESI) calcd for  $\text{C}_{27}\text{H}_{29}\text{NO}_7 + \text{H}$ ,  $m/z$  480.2022, found 480.2017.

## NMR Spectra

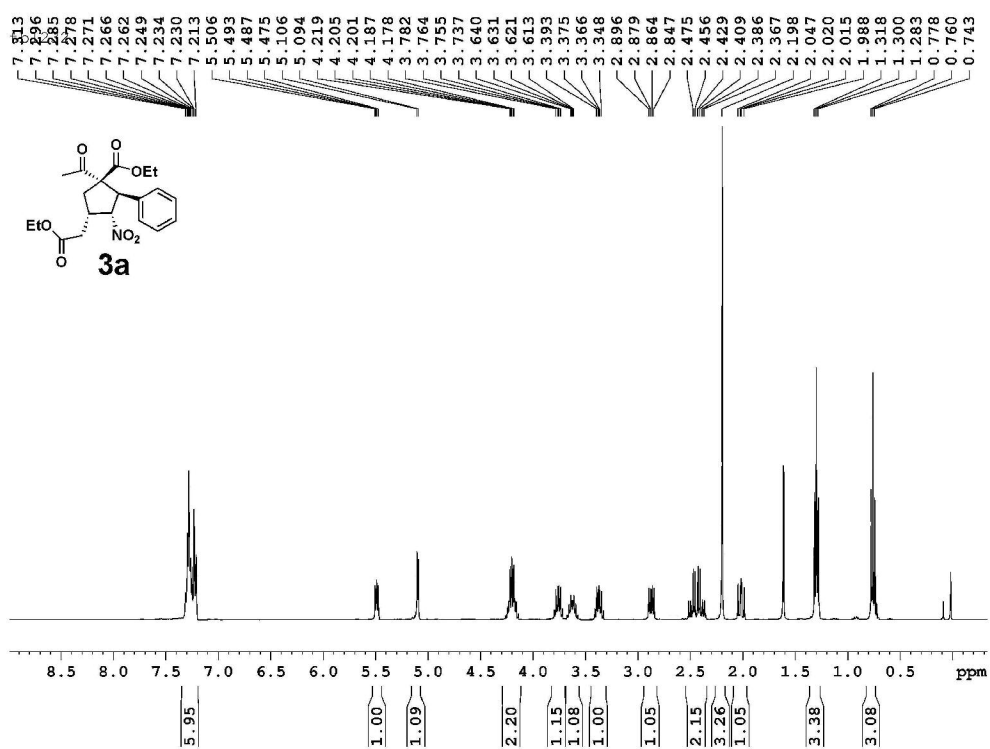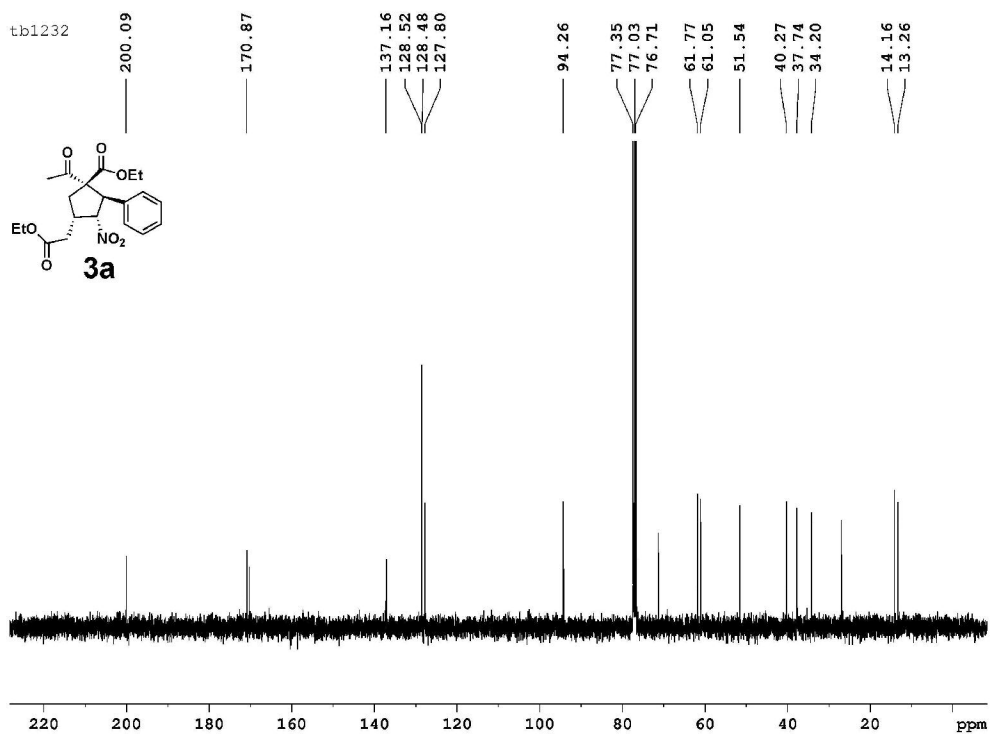

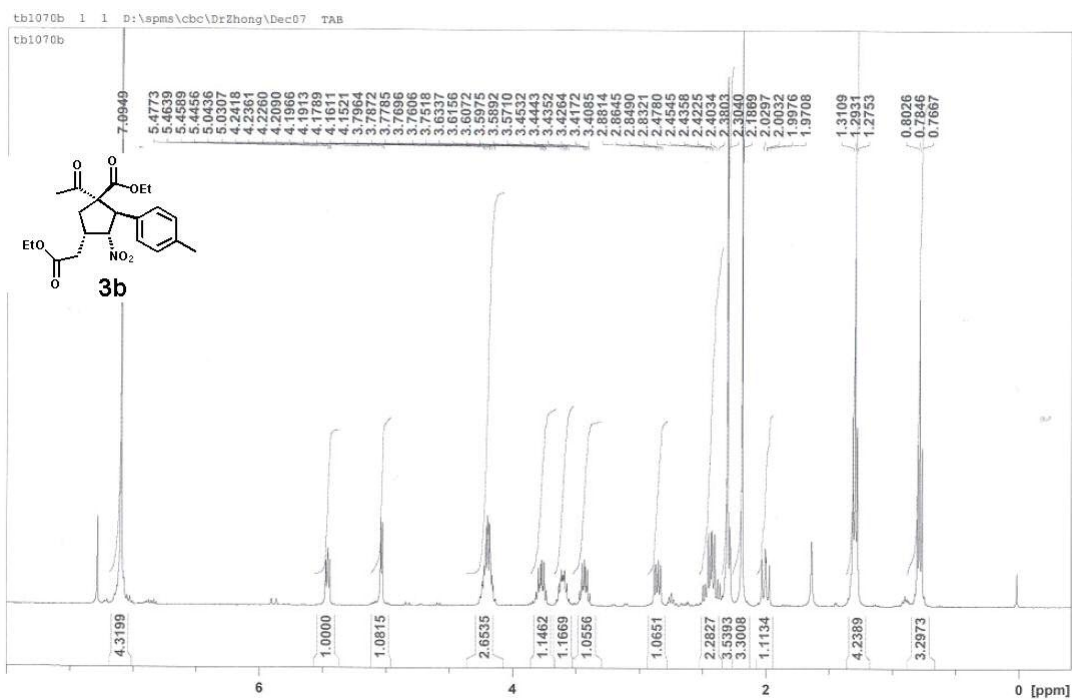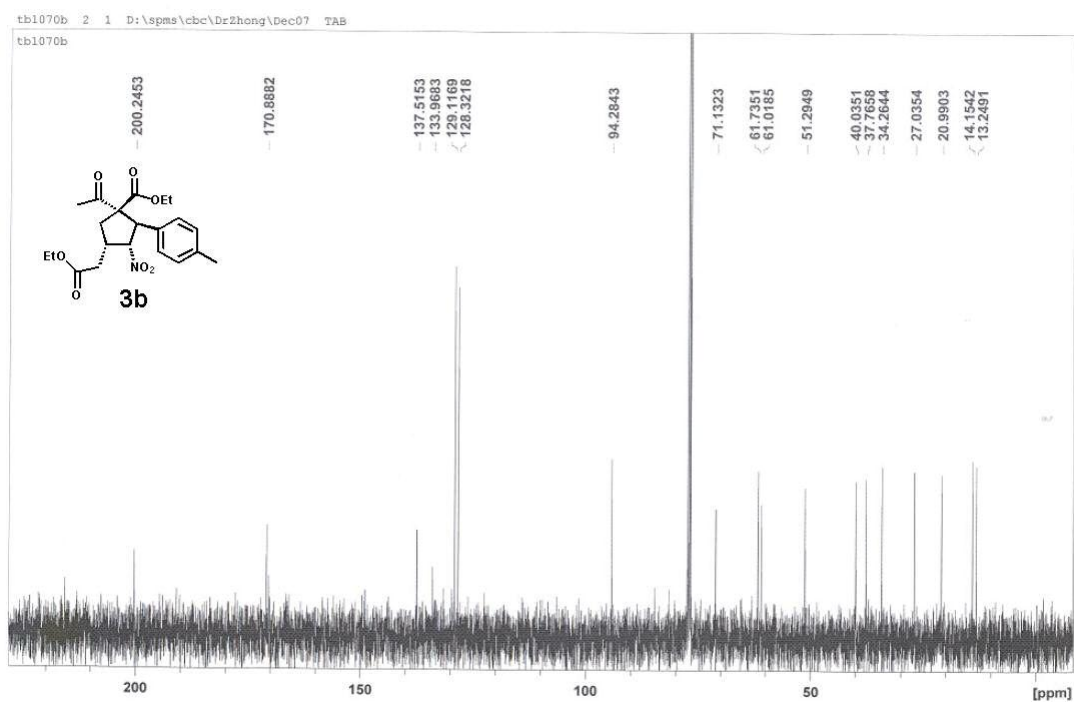

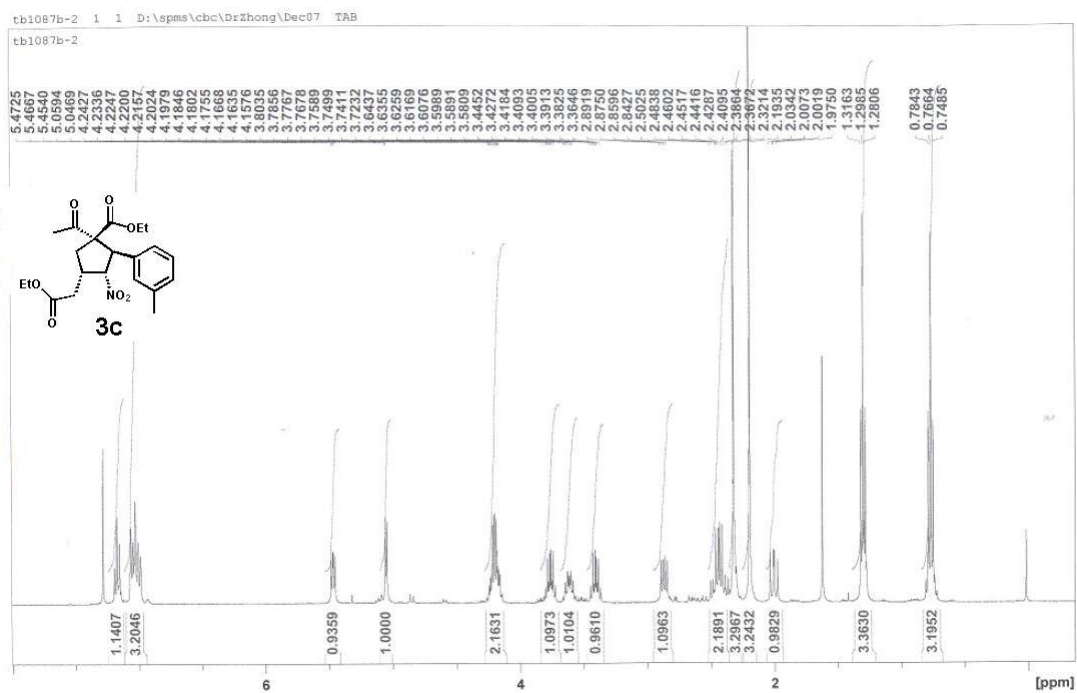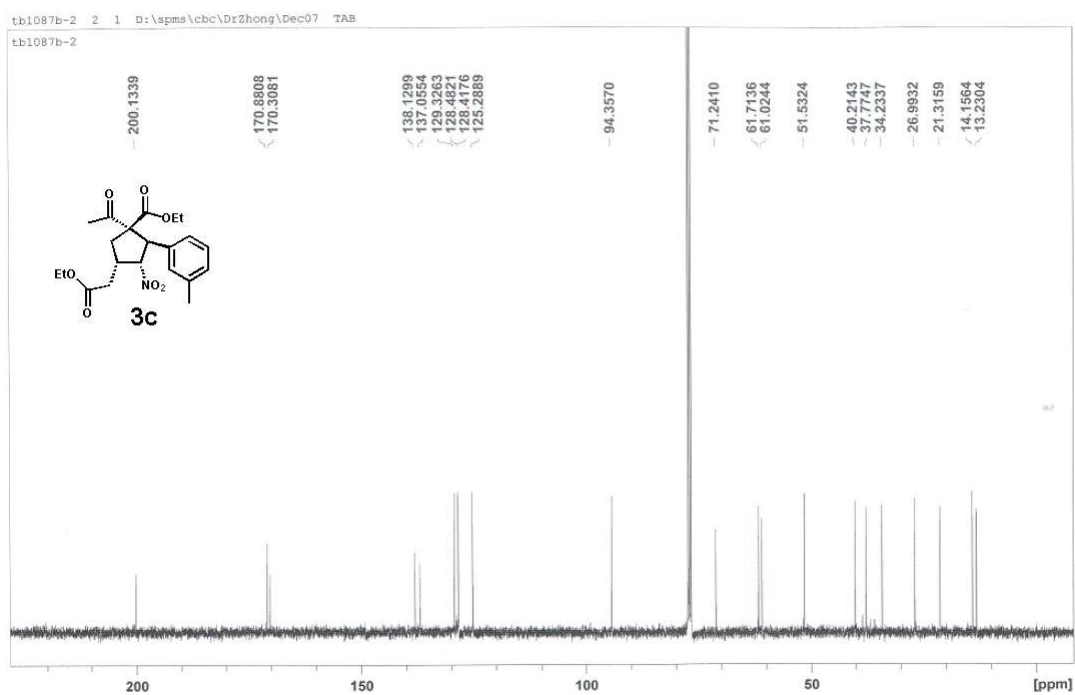

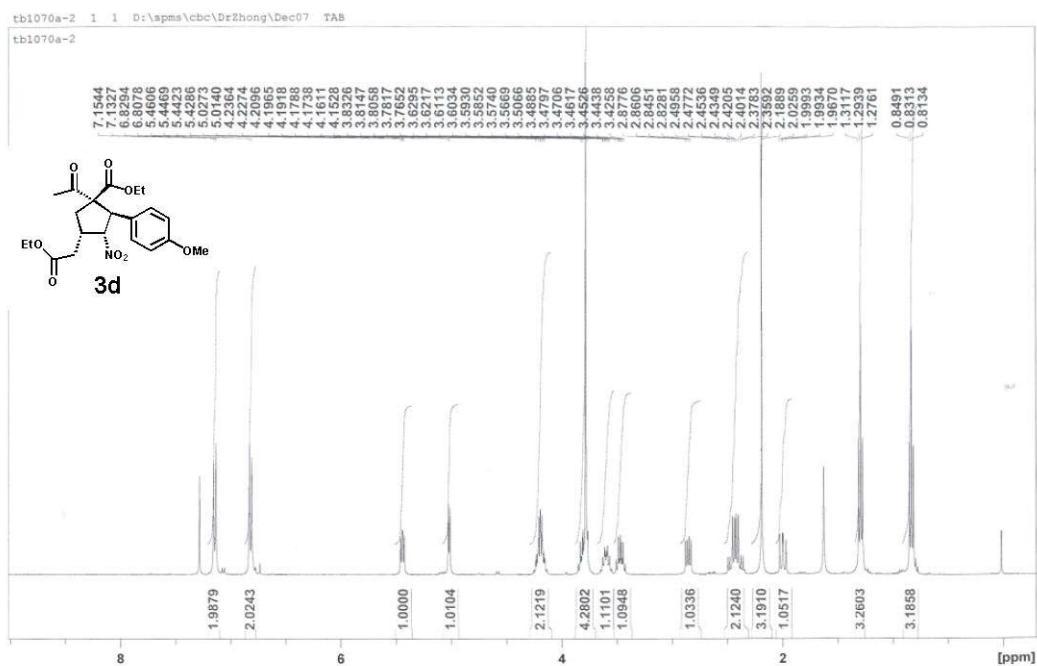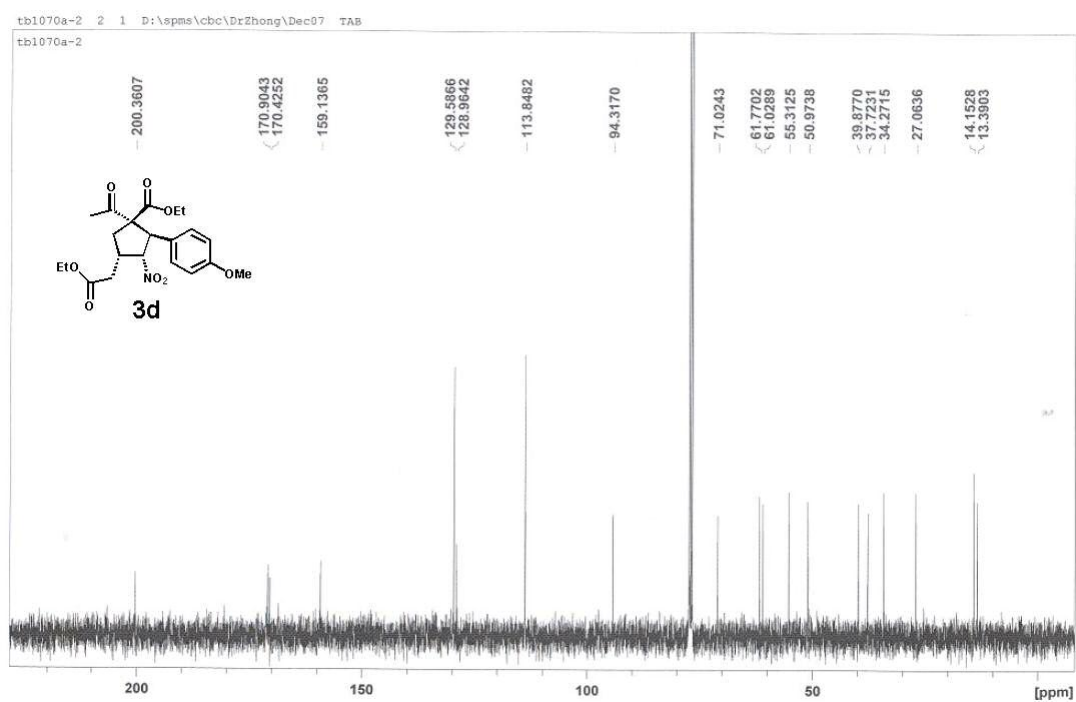



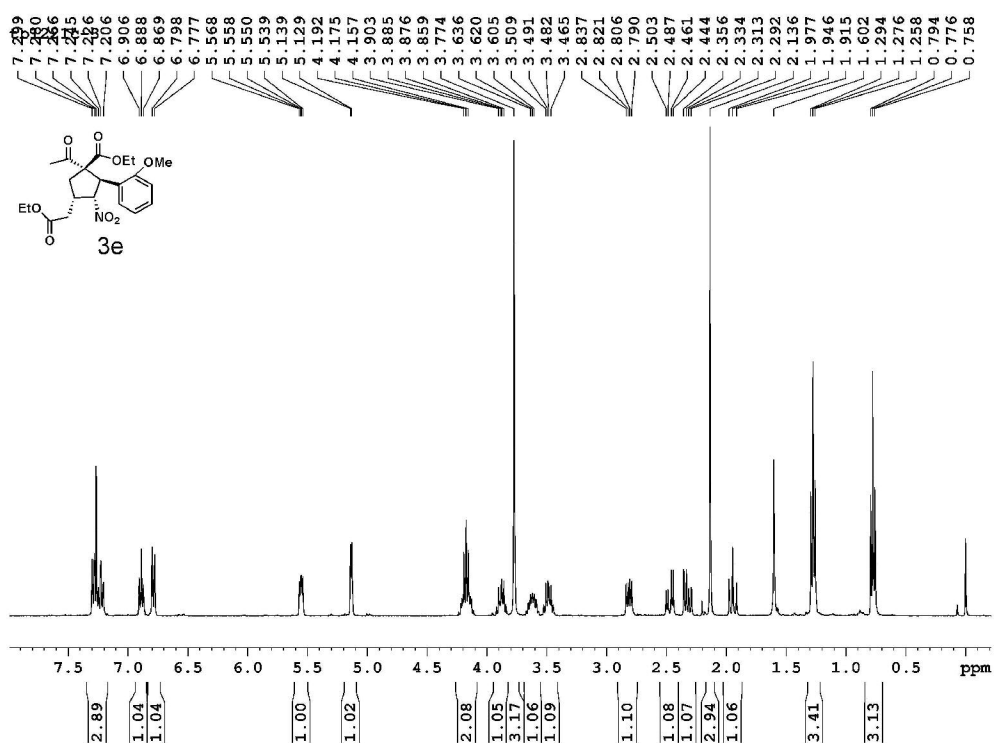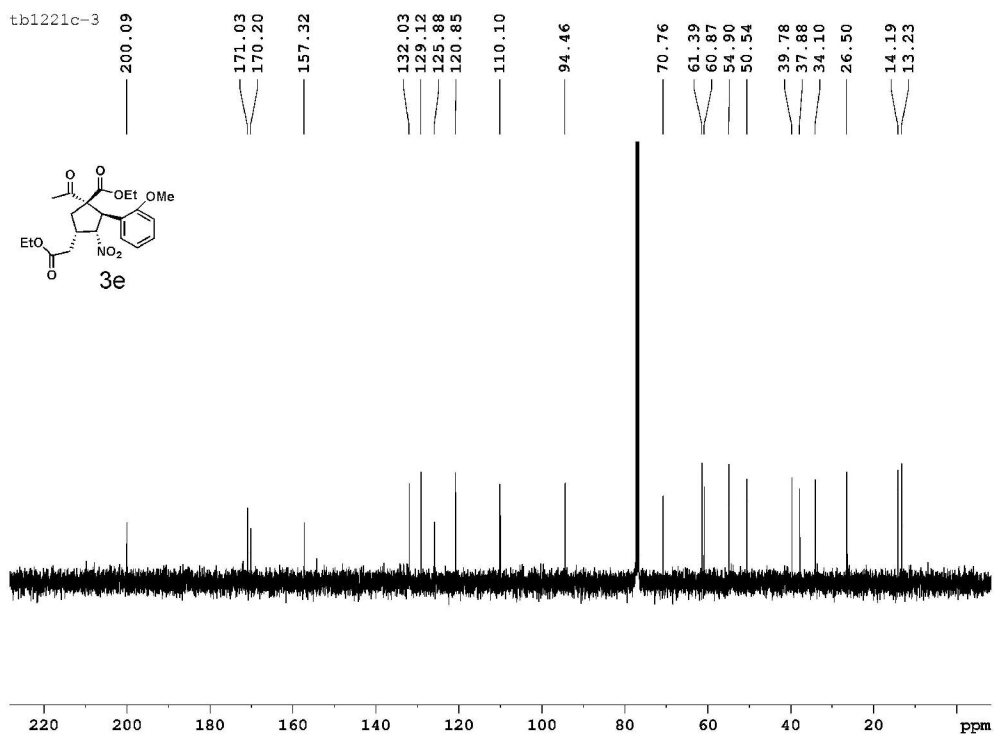

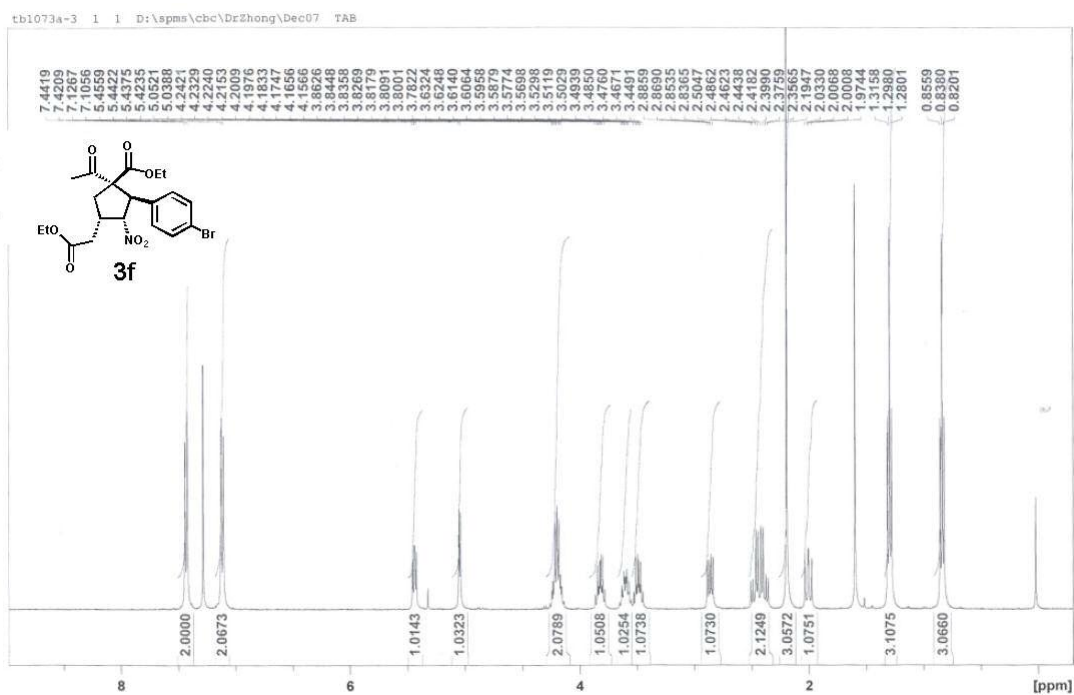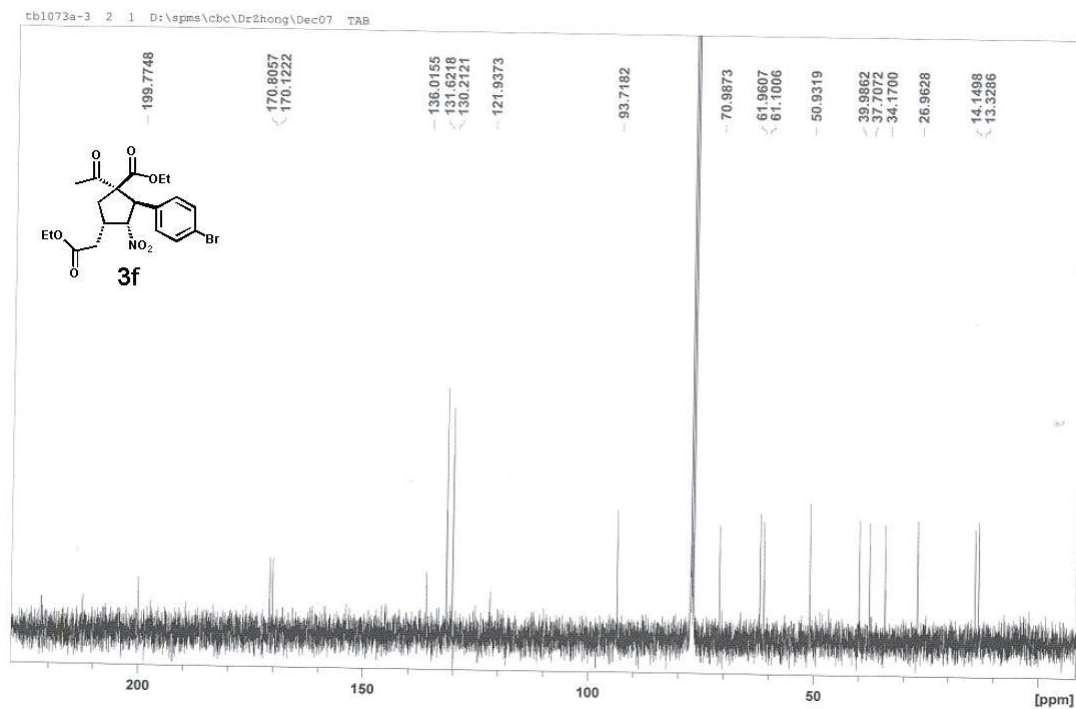

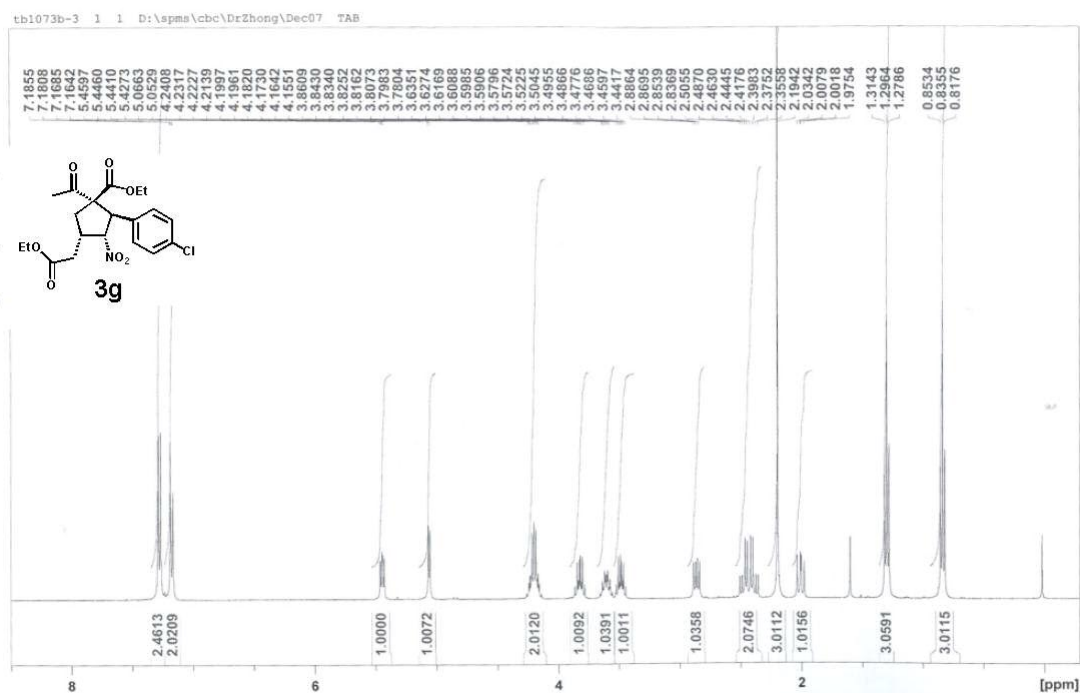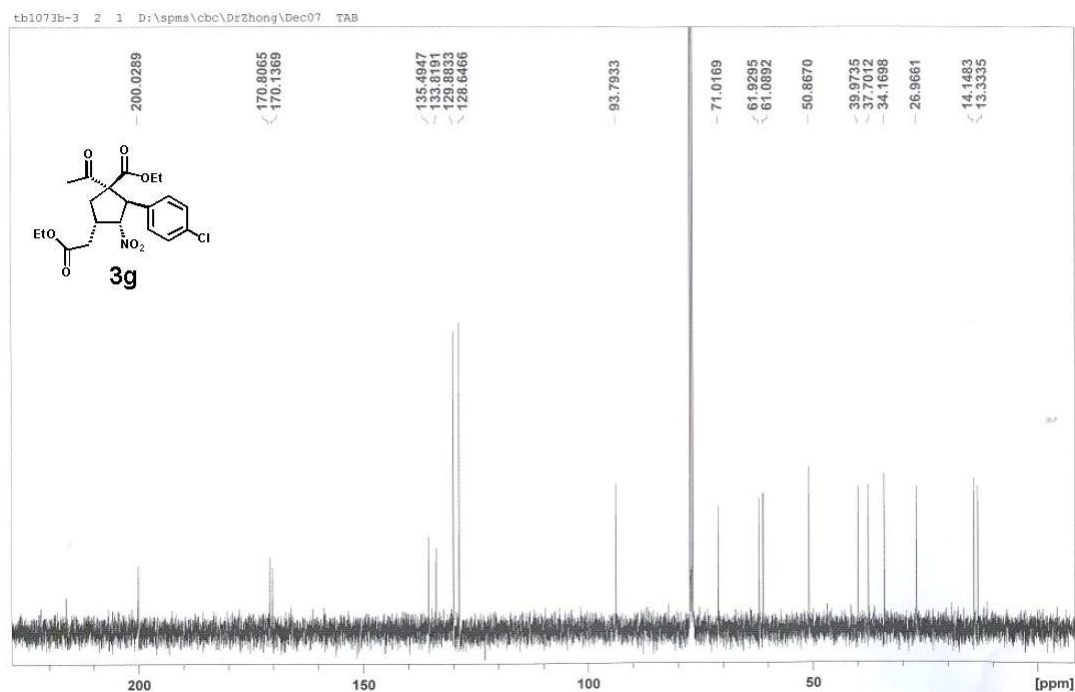

tb1090c 1 1 D:\spms\cbc\DrZhong\Dec07 TAB

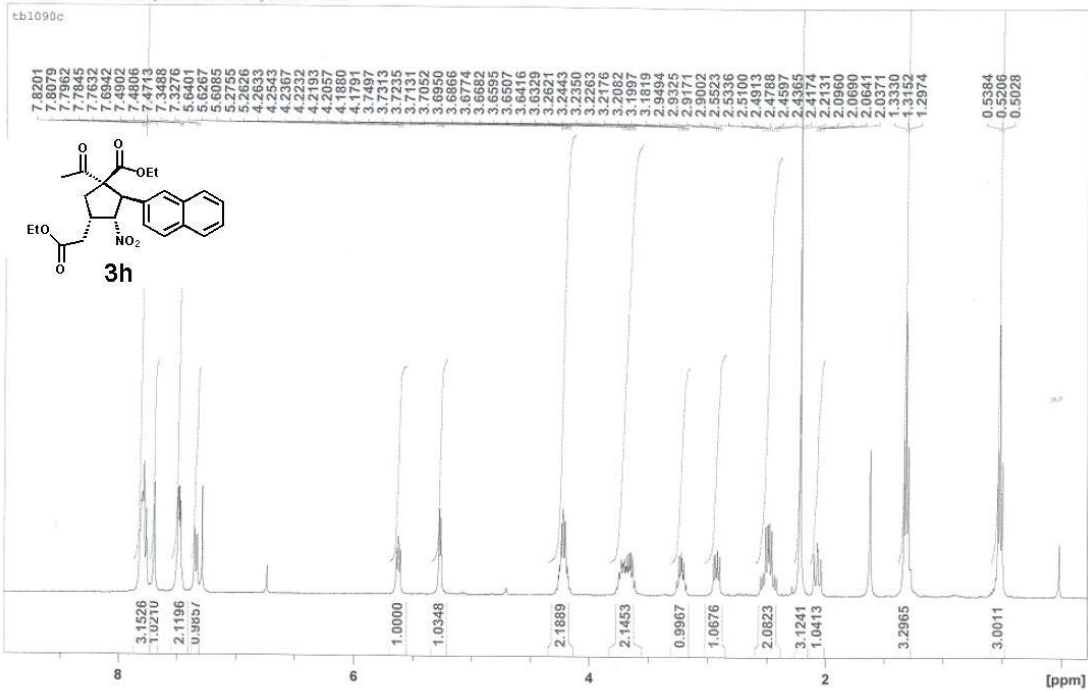

tb1090c 2 1 D:\spms\cbc\DrZhong\Dec07 TAB

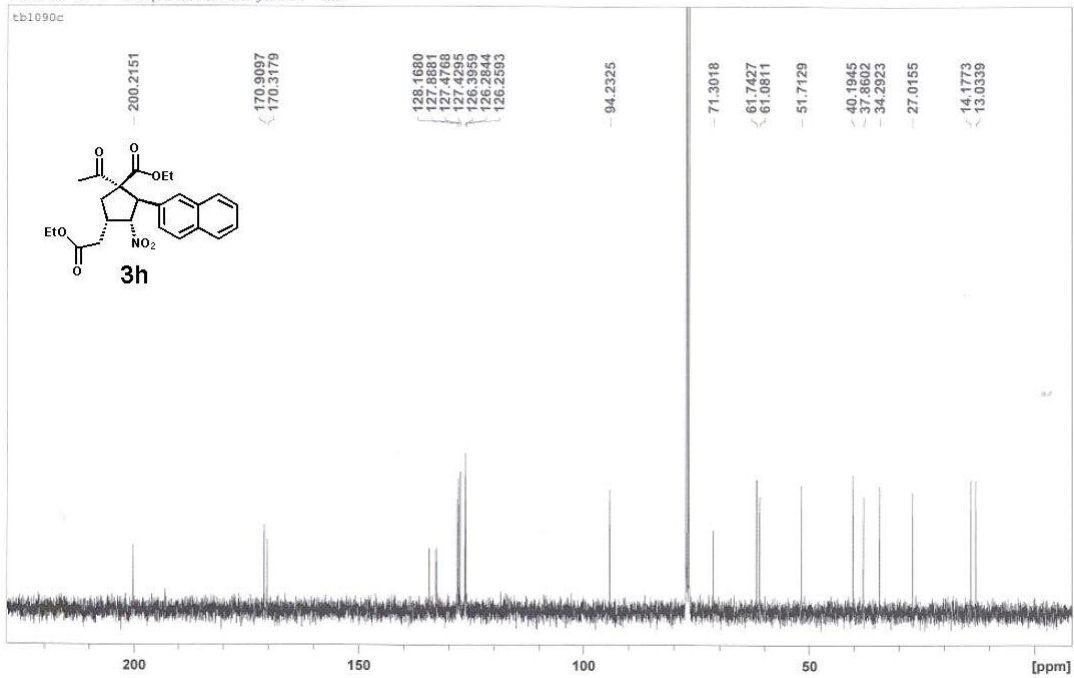

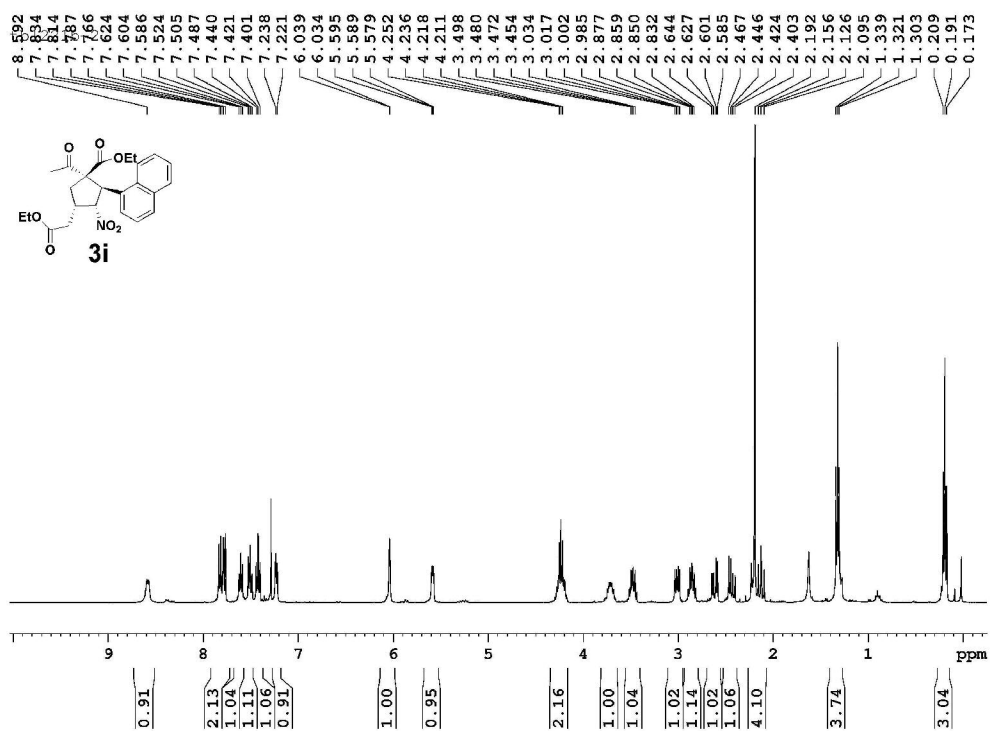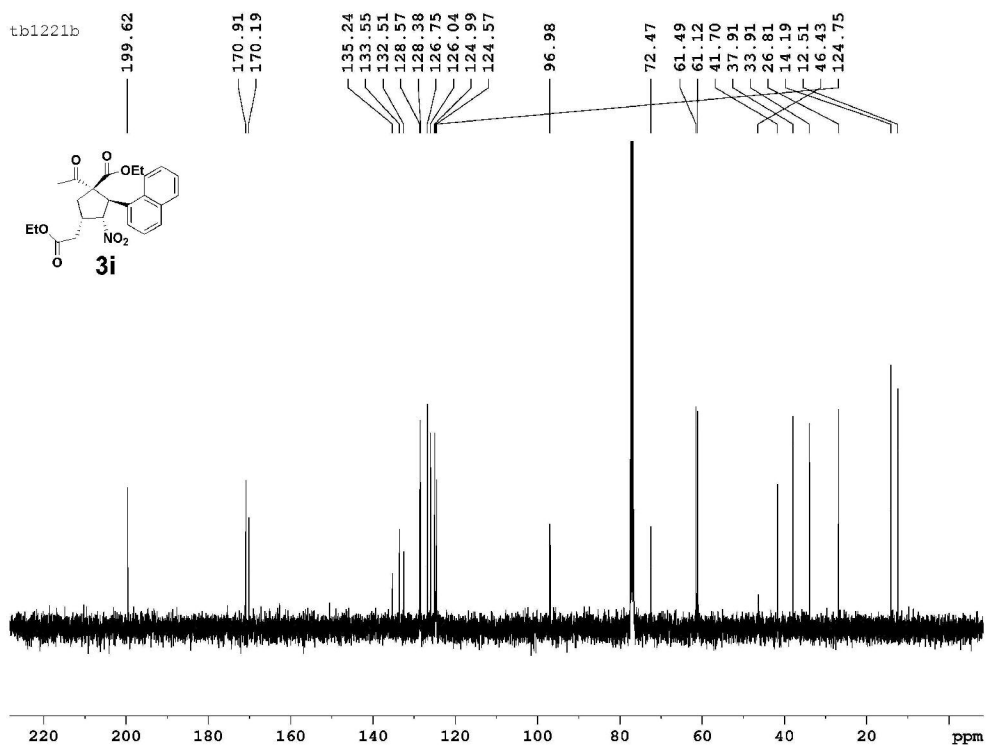



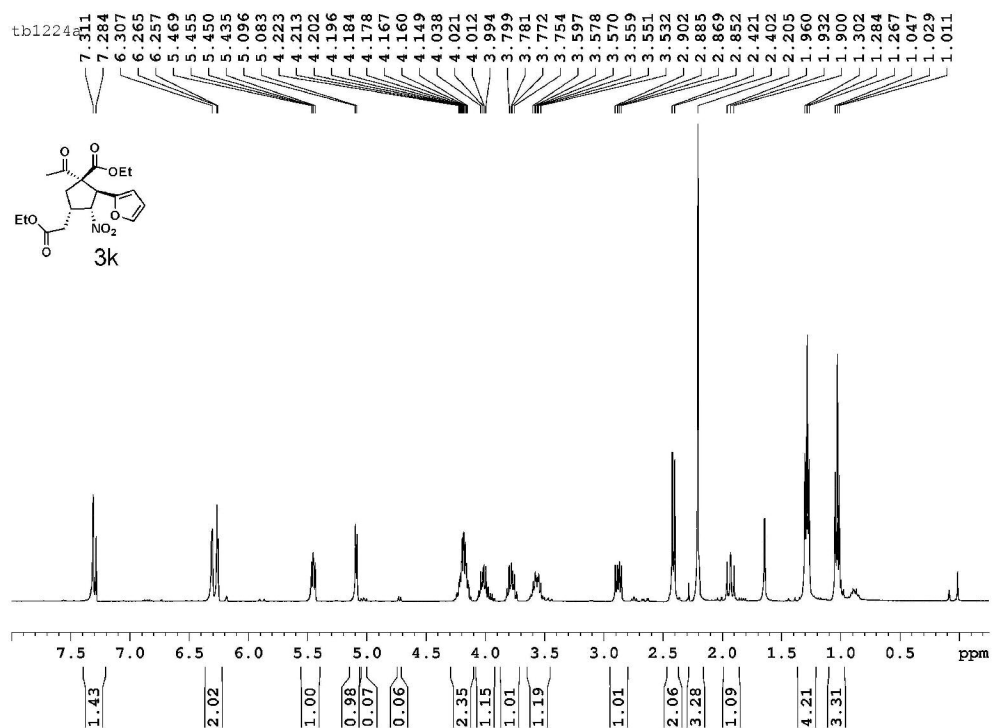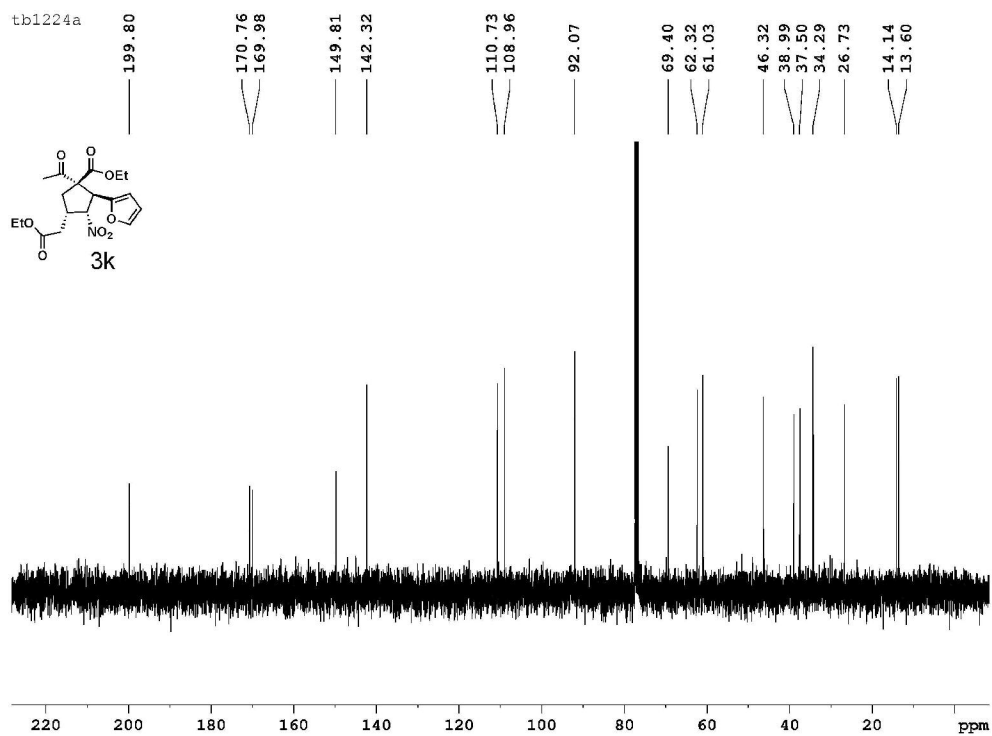

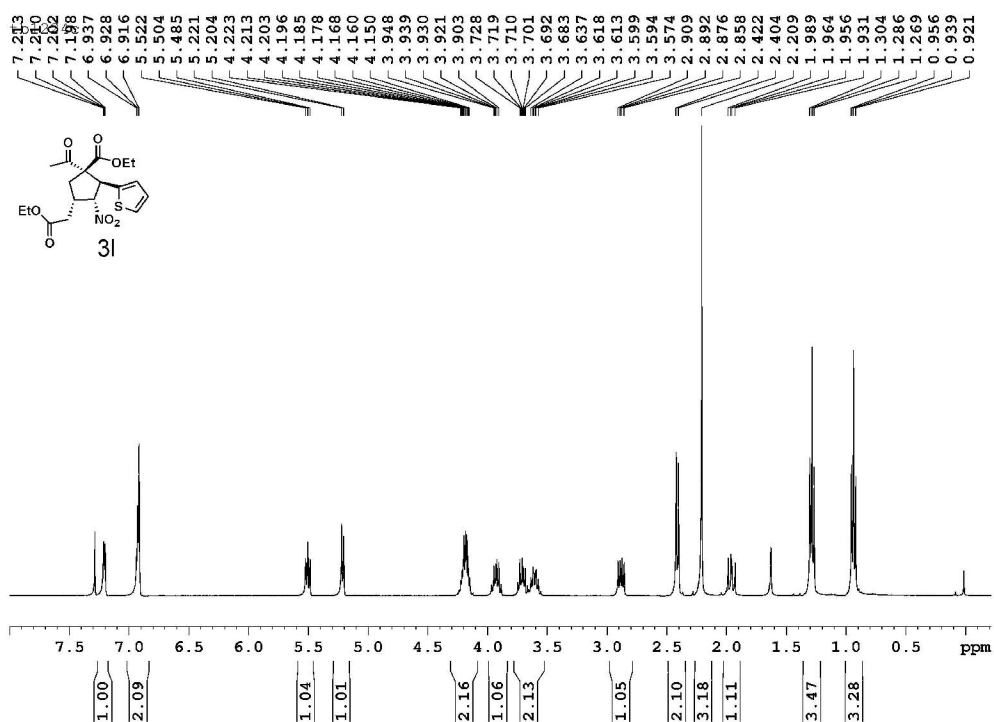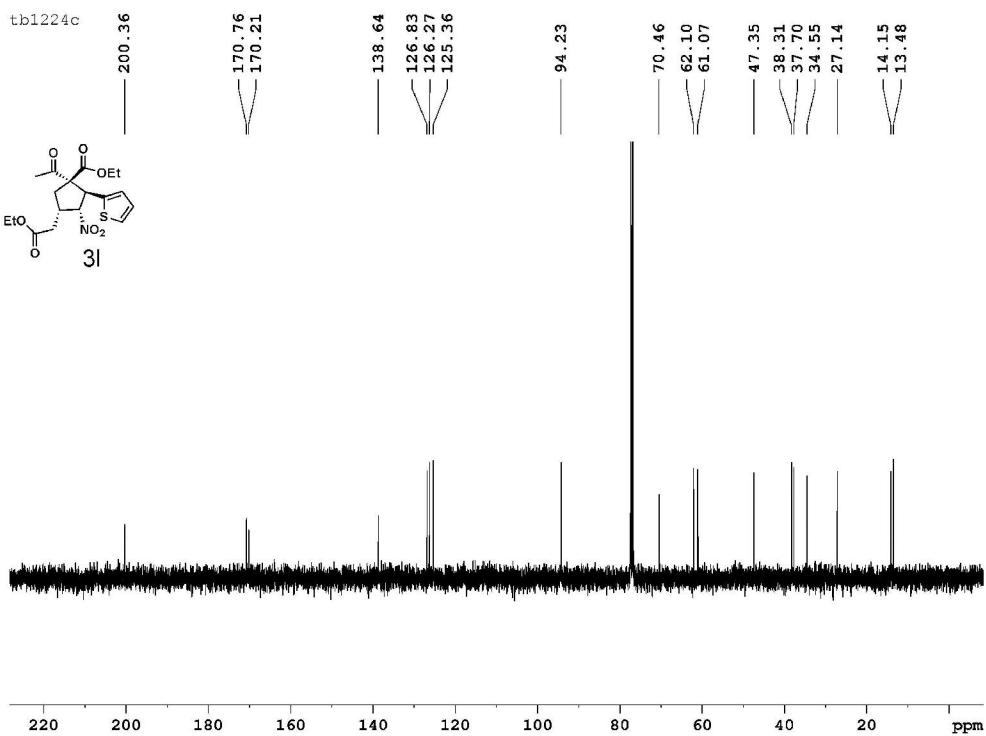



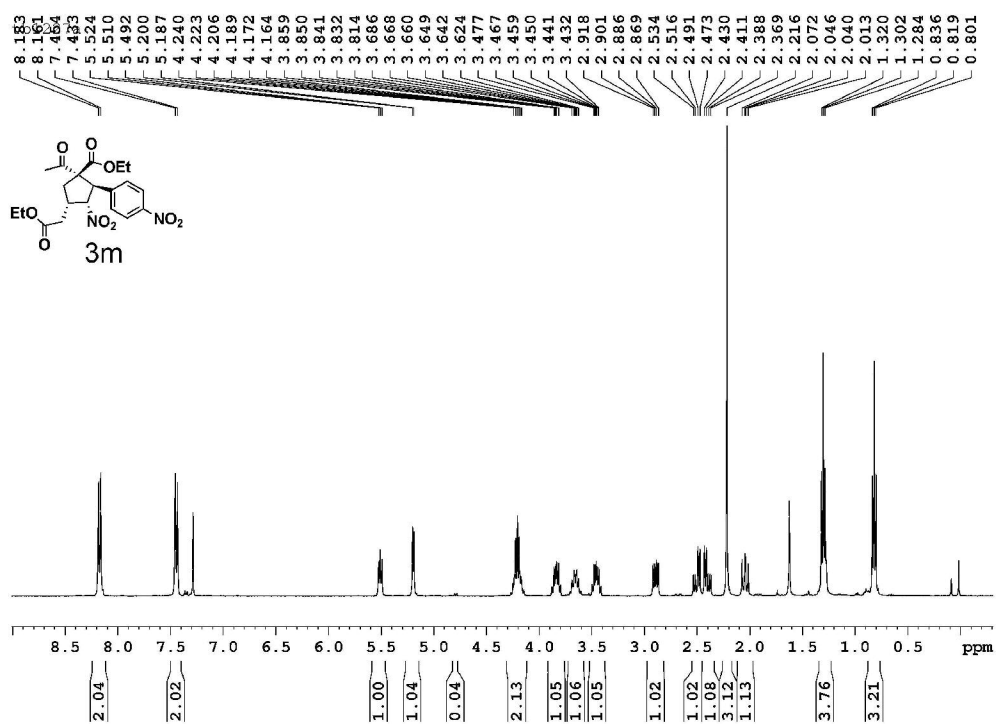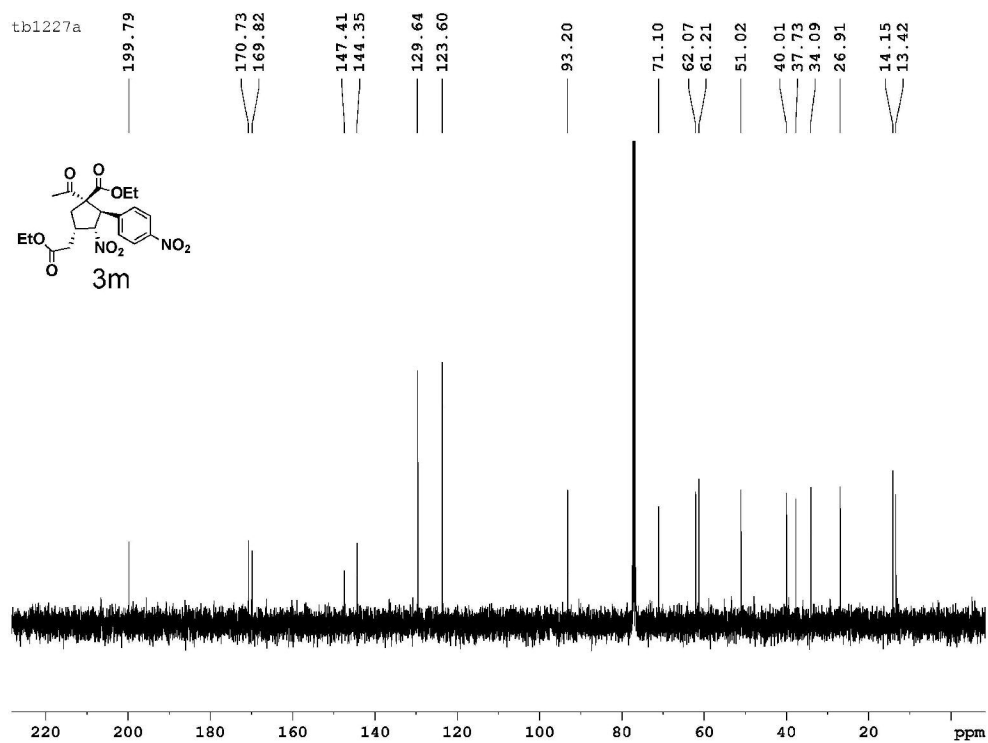

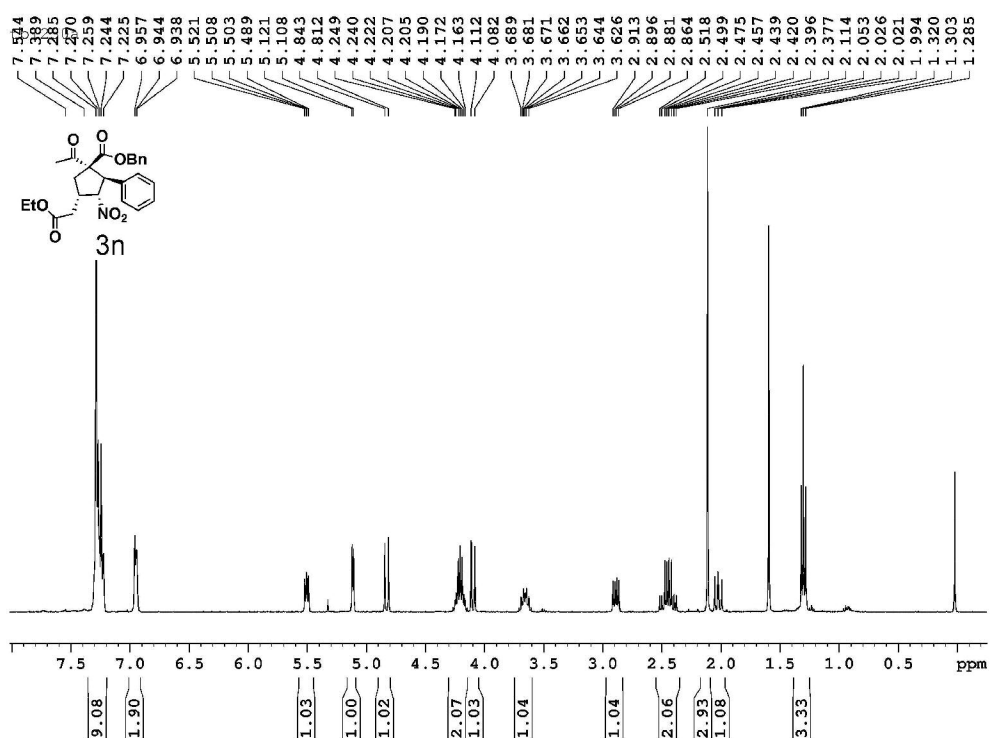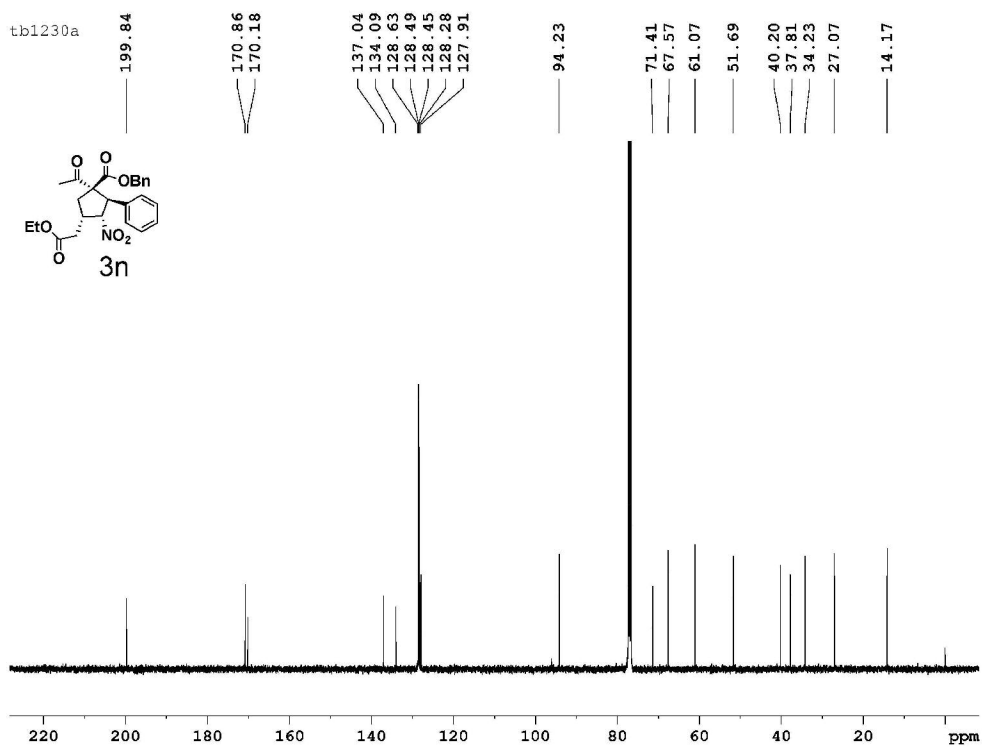

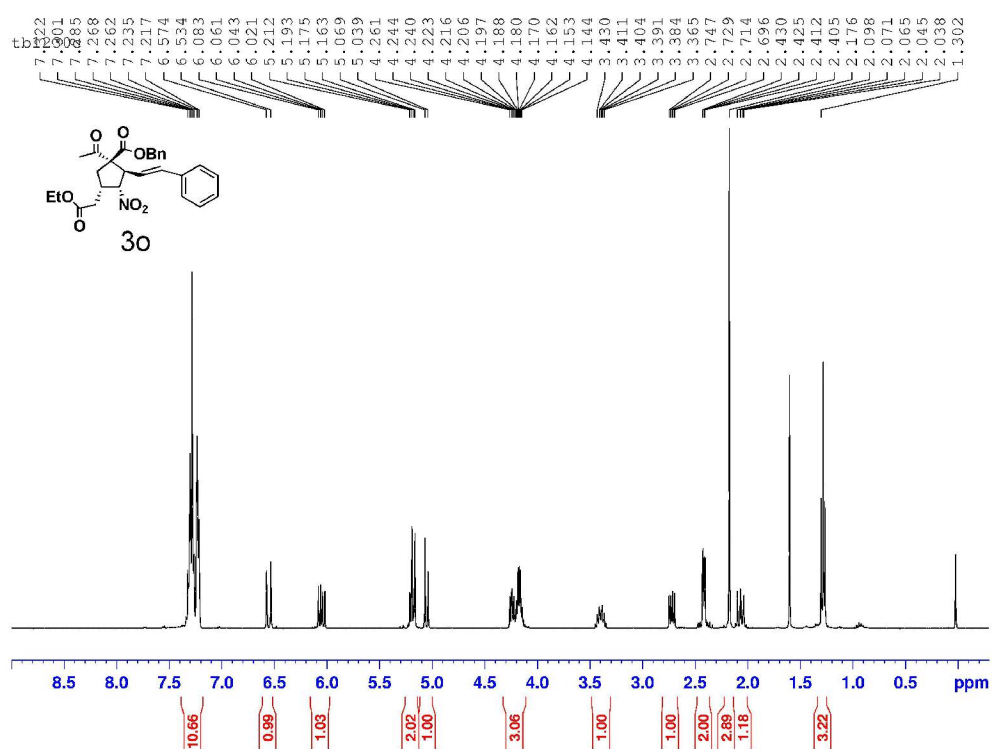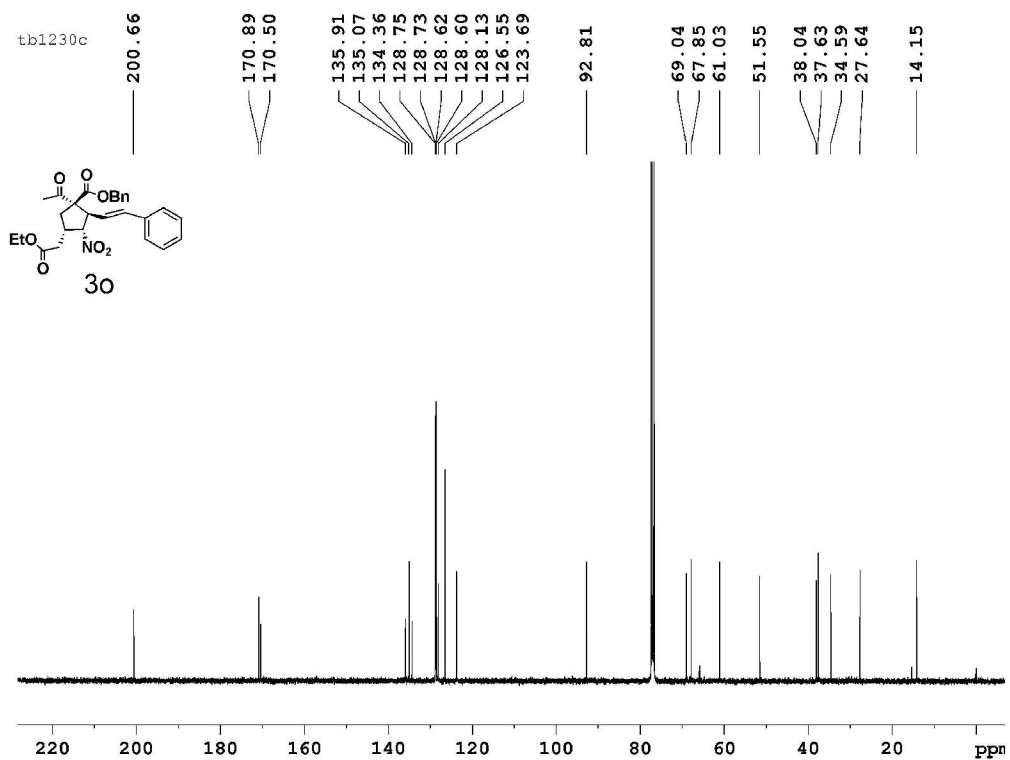

# HPLC Spectra

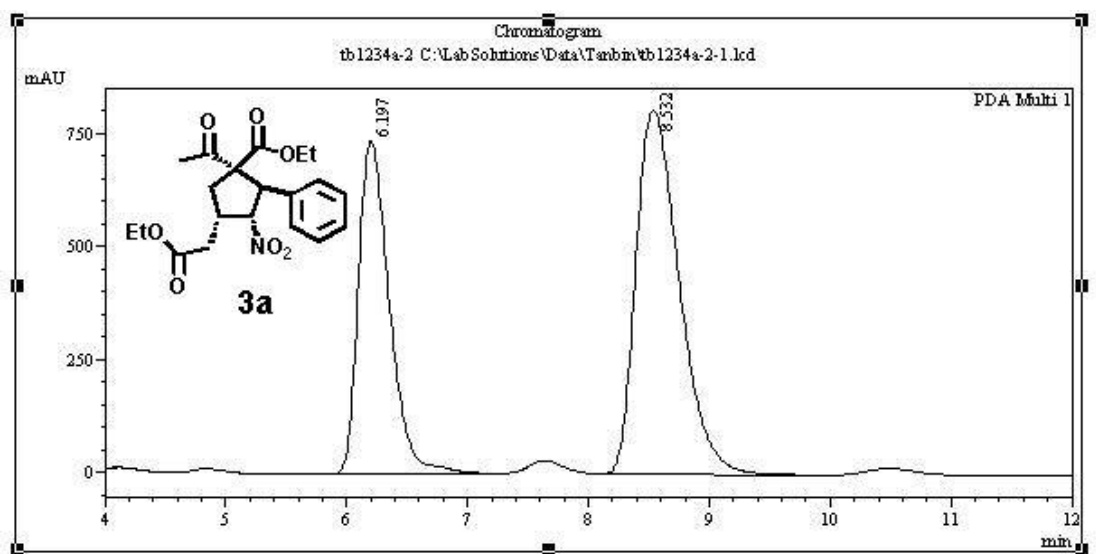

PeakTable

PDA Ch1 220nm 4nm

| Peak# | Ret. Time | Area     | Height  | Area %  | Height % |
|-------|-----------|----------|---------|---------|----------|
| 1     | 6.197     | 13061803 | 735549  | 39.348  | 47.666   |
| 2     | 8.532     | 20134209 | 807569  | 60.652  | 52.334   |
| Total |           | 33196012 | 1543118 | 100.000 | 100.000  |

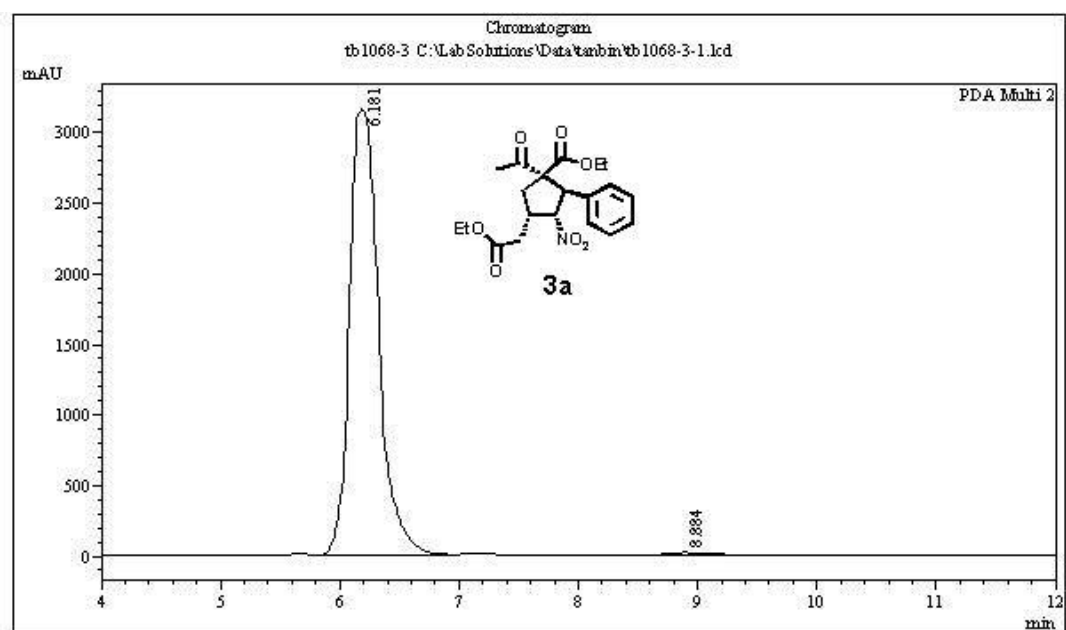

PeakTable

PDA Ch2 230nm 4nm

| Peak# | Ret. Time | Area     | Height  | Area %  | Height % |
|-------|-----------|----------|---------|---------|----------|
| 1     | 6.181     | 53665704 | 3153678 | 98.957  | 99.353   |
| 2     | 8.884     | 565881   | 20552   | 1.043   | 0.647    |
| Total |           | 54231586 | 3174230 | 100.000 | 100.000  |

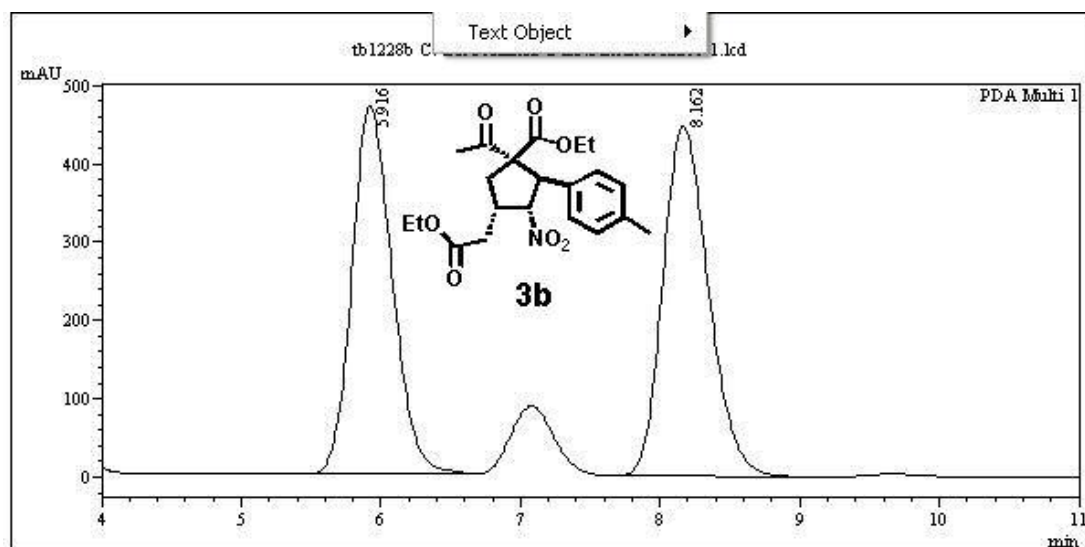

PeakTable

PDA Ch1 220nm 4nm

| Peak# | Ret. Time | Area     | Height | Area %  | Height % |
|-------|-----------|----------|--------|---------|----------|
| 1     | 5.916     | 9429191  | 470267 | 48.127  | 51.263   |
| 2     | 8.162     | 10163065 | 447097 | 51.873  | 48.737   |
| Total |           | 19592256 | 917364 | 100.000 | 100.000  |

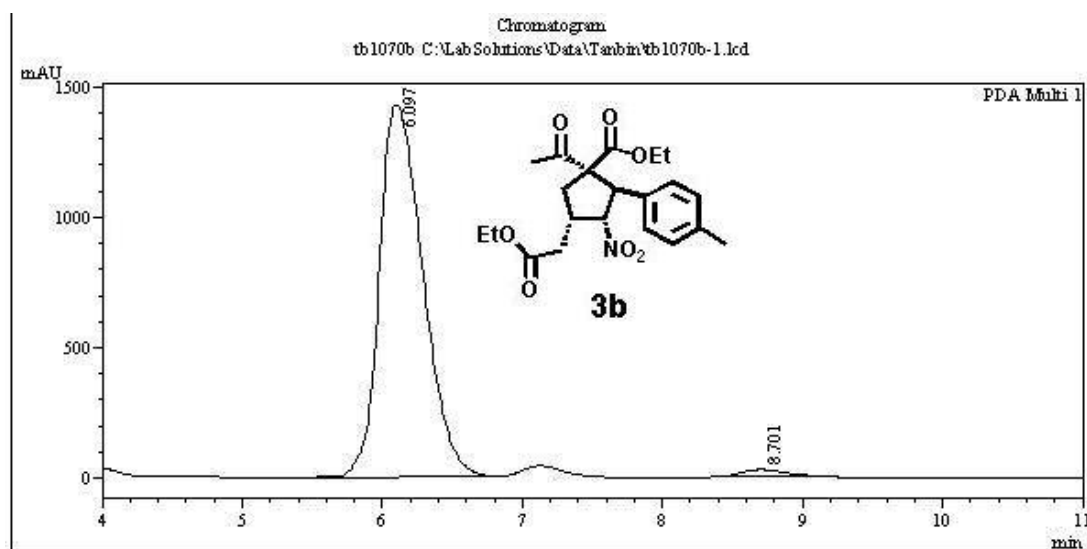

PeakTable

PDA Ch1 220nm 4nm

| Peak# | Ret. Time | Area     | Height  | Area %  | Height % |
|-------|-----------|----------|---------|---------|----------|
| 1     | 6.097     | 30844320 | 1425898 | 97.983  | 98.105   |
| 2     | 8.701     | 635084   | 27547   | 2.017   | 1.895    |
| Total |           | 31479404 | 1453445 | 100.000 | 100.000  |

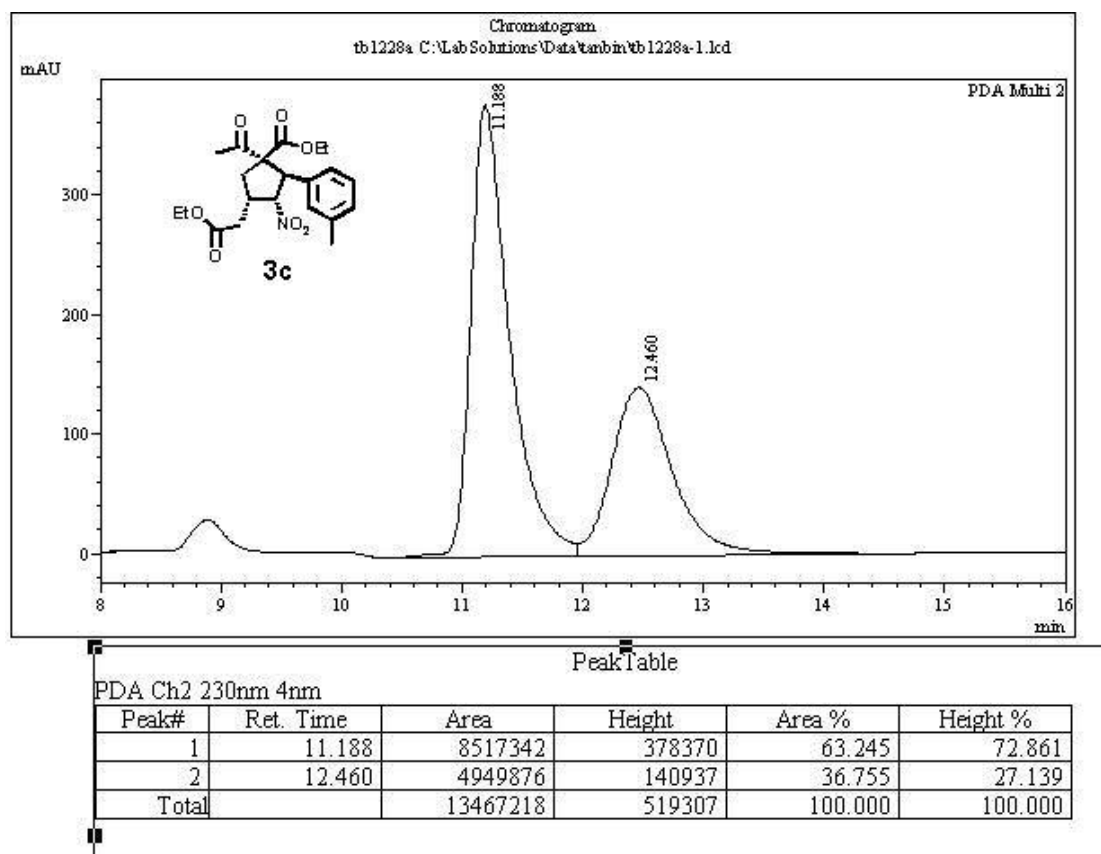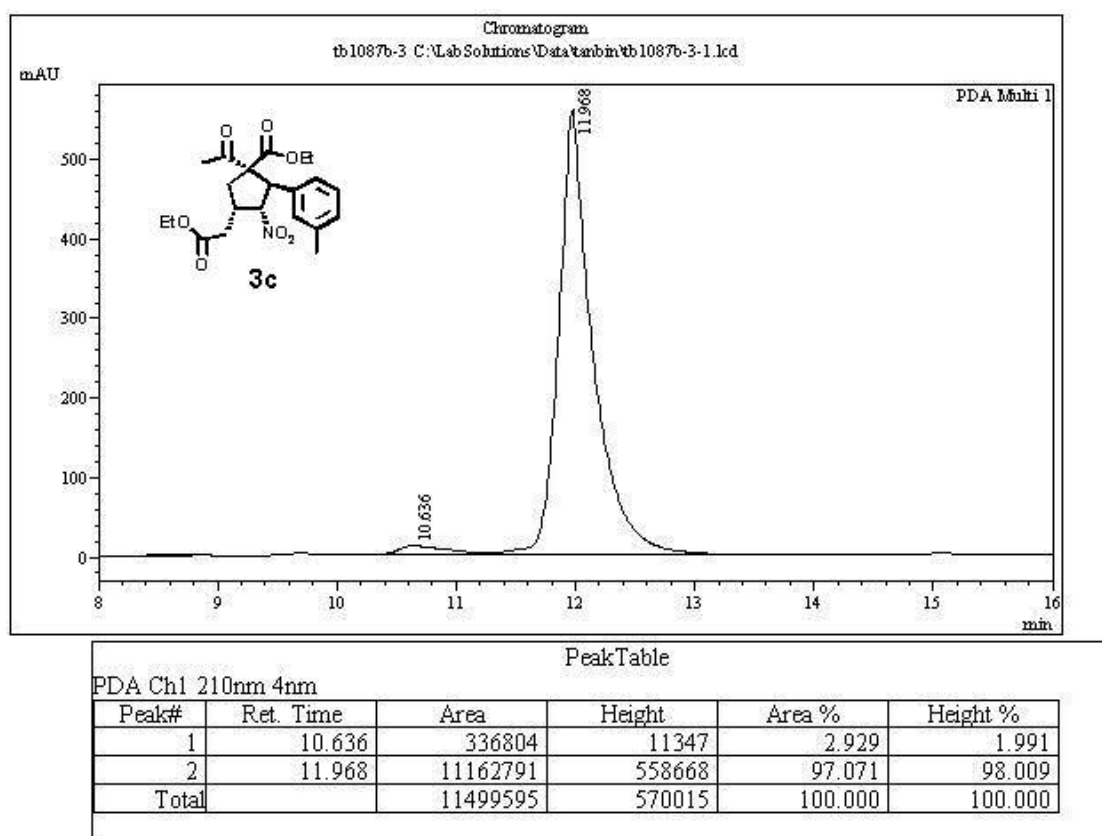

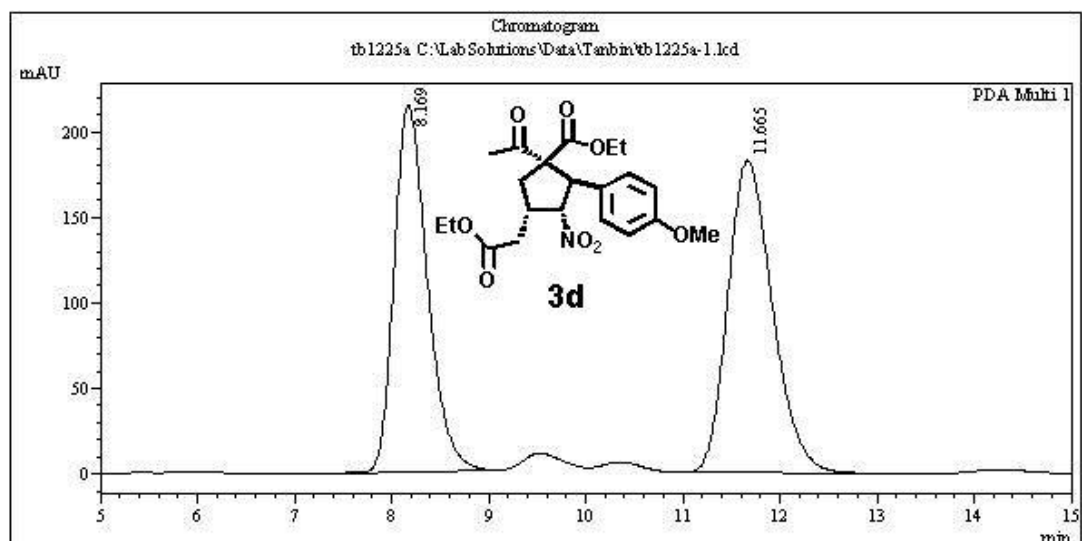

PeakTable

PDA Ch1 220nm 4nm

| Peak# | Ret. Time | Area     | Height | Area %  | Height % |
|-------|-----------|----------|--------|---------|----------|
| 1     | 8.169     | 5094138  | 214474 | 46.608  | 54.025   |
| 2     | 11.665    | 5835561  | 182518 | 53.392  | 45.975   |
| Total |           | 10929699 | 396993 | 100.000 | 100.000  |

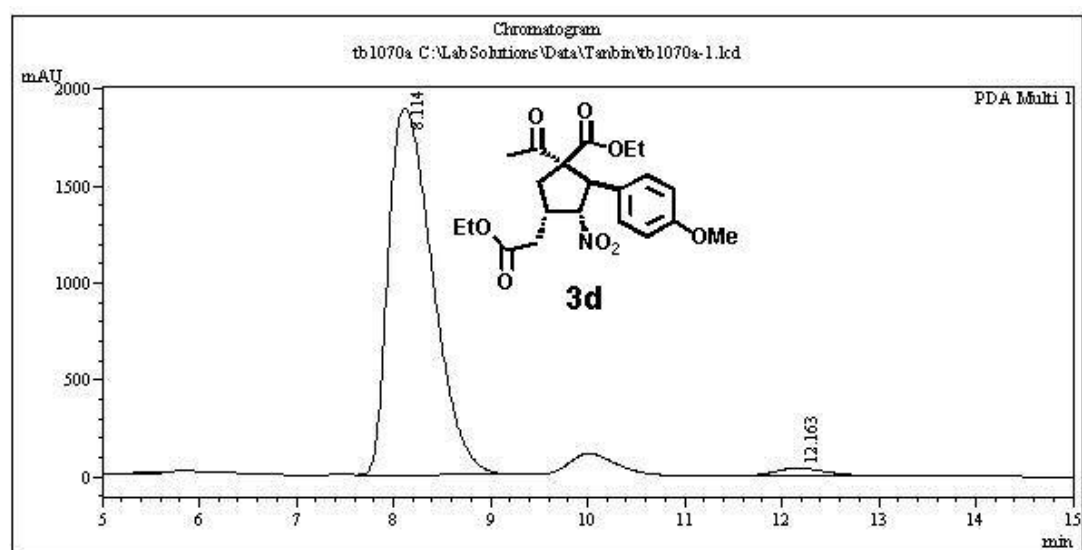

PeakTable

PDA Ch1 220nm 4nm

| Peak# | Ret. Time | Area     | Height  | Area %  | Height % |
|-------|-----------|----------|---------|---------|----------|
| 1     | 8.114     | 59769180 | 1892428 | 98.030  | 98.105   |
| 2     | 12.163    | 1201292  | 36552   | 1.970   | 1.895    |
| Total |           | 60970471 | 1928981 | 100.000 | 100.000  |

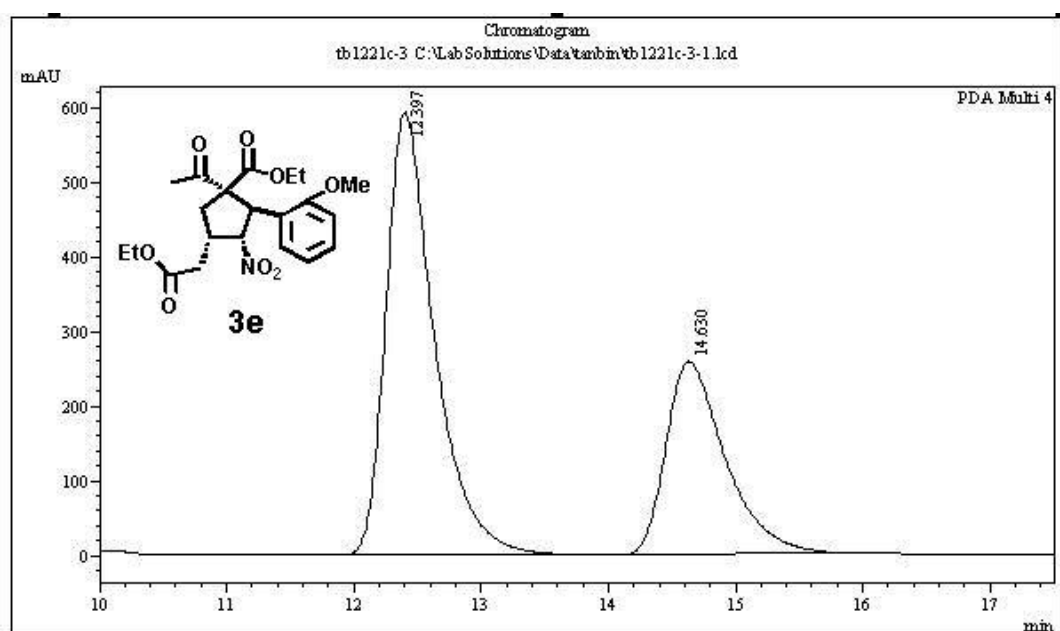

PeakTable

PDA Ch4 220nm 4nm

| Peak# | Ret. Time | Area     | Height | Area %  | Height % |
|-------|-----------|----------|--------|---------|----------|
| 1     | 12.397    | 15754103 | 592810 | 65.165  | 69.611   |
| 2     | 14.630    | 8421506  | 258789 | 34.835  | 30.389   |
| Total |           | 24175609 | 851599 | 100.000 | 100.000  |

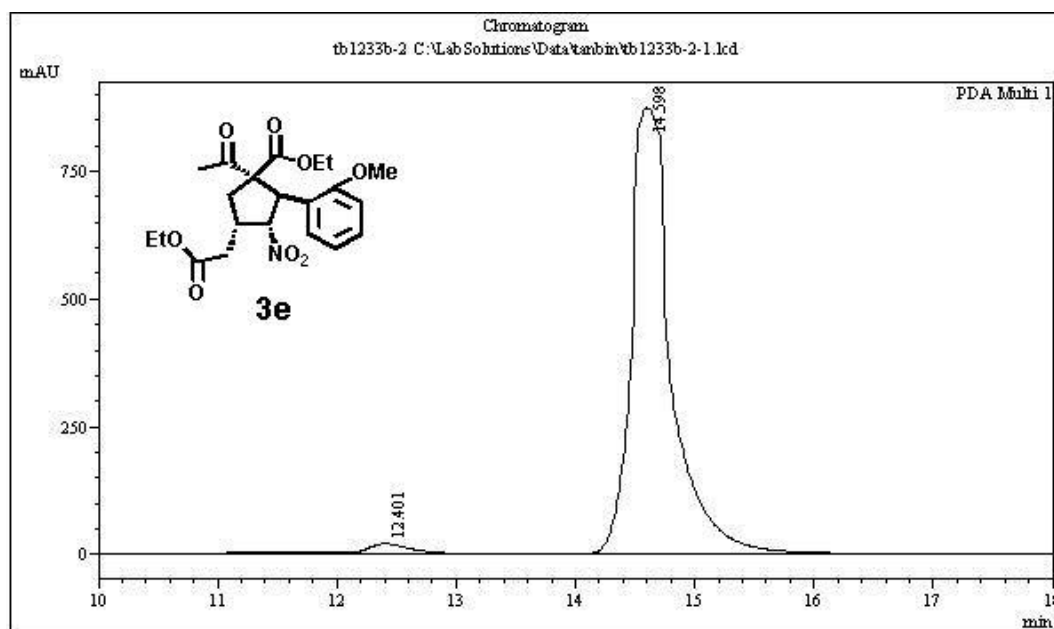

PeakTable

PDA Ch1 210nm 4nm

| Peak# | Ret. Time | Area     | Height | Area %  | Height % |
|-------|-----------|----------|--------|---------|----------|
| 1     | 12.401    | 513863   | 20153  | 2.431   | 2.257    |
| 2     | 14.598    | 20623530 | 872686 | 97.569  | 97.743   |
| Total |           | 21137393 | 892838 | 100.000 | 100.000  |



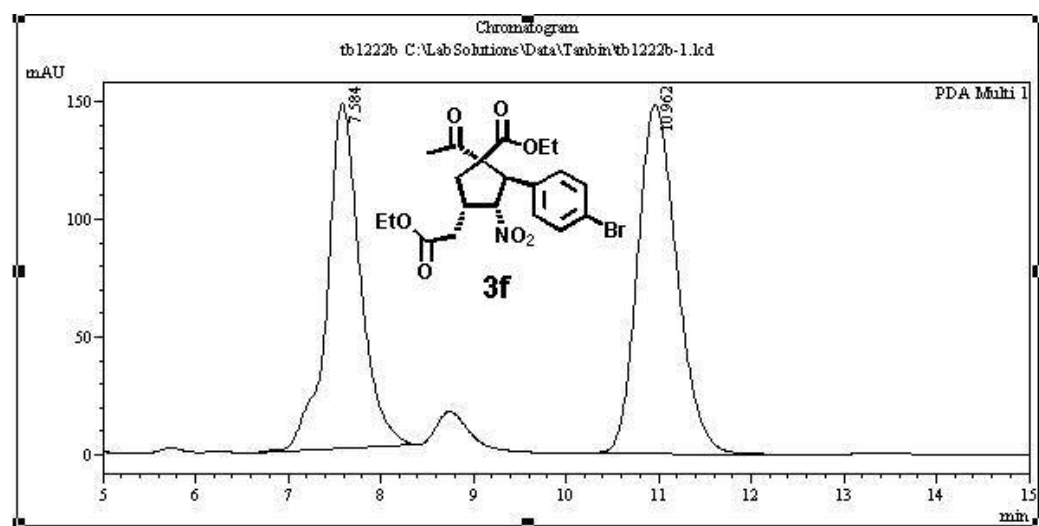

PeakTable

PDA Ch1 220nm 4nm

| Peak# | Ret. Time | Area    | Height | Area %  | Height % |
|-------|-----------|---------|--------|---------|----------|
| 1     | 7.584     | 3655715 | 146829 | 45.469  | 49.756   |
| 2     | 10.962    | 4384243 | 148266 | 54.531  | 50.244   |
| Total |           | 8039958 | 295095 | 100.000 | 100.000  |

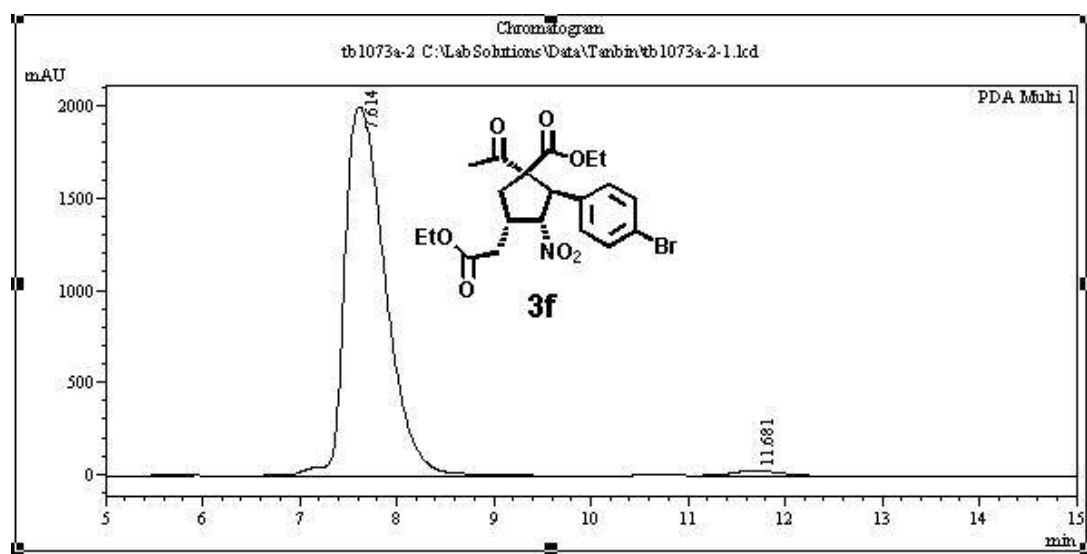

PeakTable

PDA Ch1 220nm 4nm

| Peak# | Ret. Time | Area     | Height  | Area %  | Height % |
|-------|-----------|----------|---------|---------|----------|
| 1     | 7.614     | 58155024 | 2001801 | 98.383  | 98.620   |
| 2     | 11.681    | 955999   | 28010   | 1.617   | 1.380    |
| Total |           | 59111022 | 2029811 | 100.000 | 100.000  |

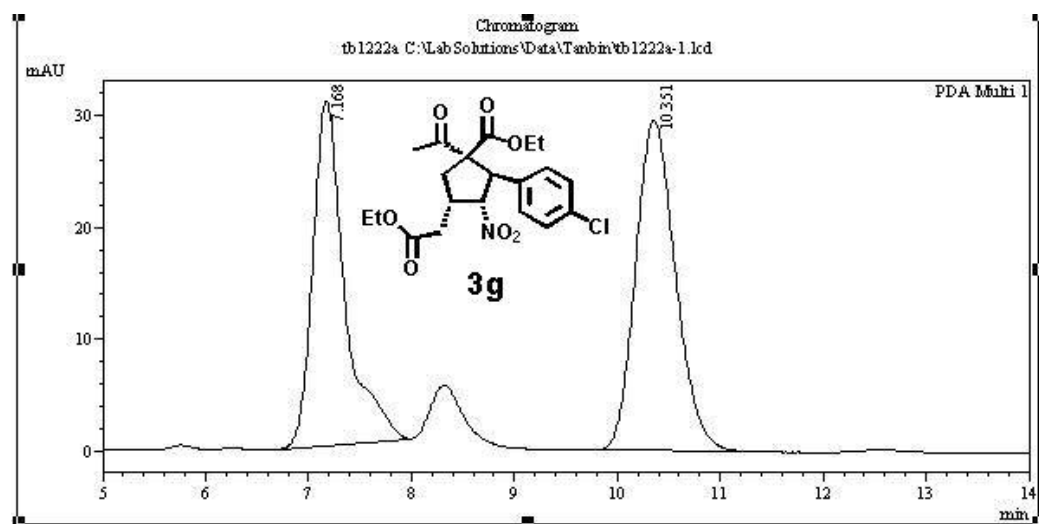

PeakTable

PDA Ch1 220nm 4nm

| Peak# | Ret. Time | Area    | Height | Area %  | Height % |
|-------|-----------|---------|--------|---------|----------|
| 1     | 7.168     | 662374  | 30710  | 45.380  | 51.037   |
| 2     | 10.351    | 797250  | 29463  | 54.620  | 48.963   |
| Total |           | 1459625 | 60173  | 100.000 | 100.000  |

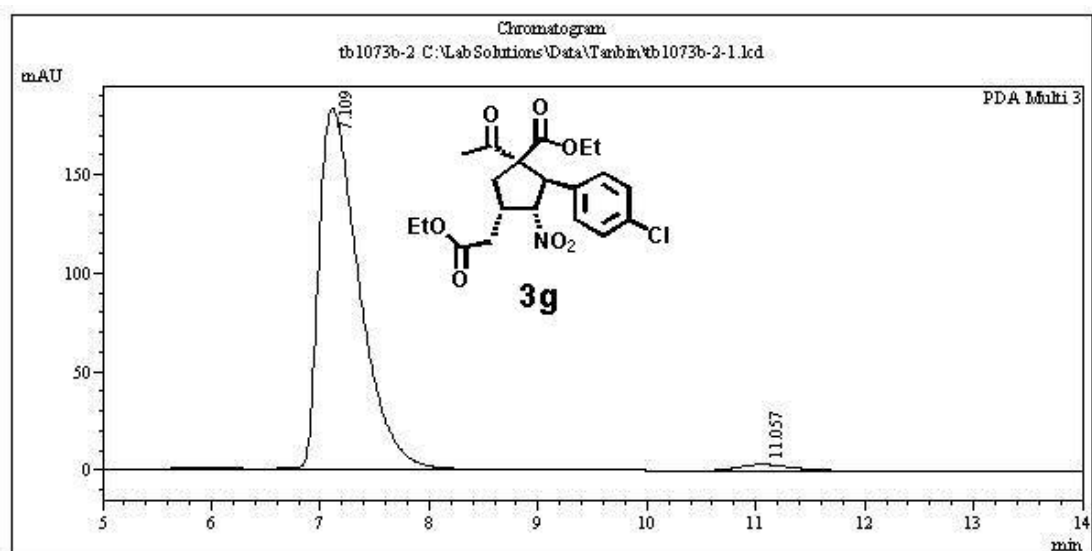

PeakTable

PDA Ch3 254nm 4nm

| Peak# | Ret. Time | Area    | Height | Area %  | Height % |
|-------|-----------|---------|--------|---------|----------|
| 1     | 7.109     | 4725021 | 183370 | 97.860  | 98.327   |
| 2     | 11.057    | 103310  | 3119   | 2.140   | 1.673    |
| Total |           | 4828331 | 186489 | 100.000 | 100.000  |

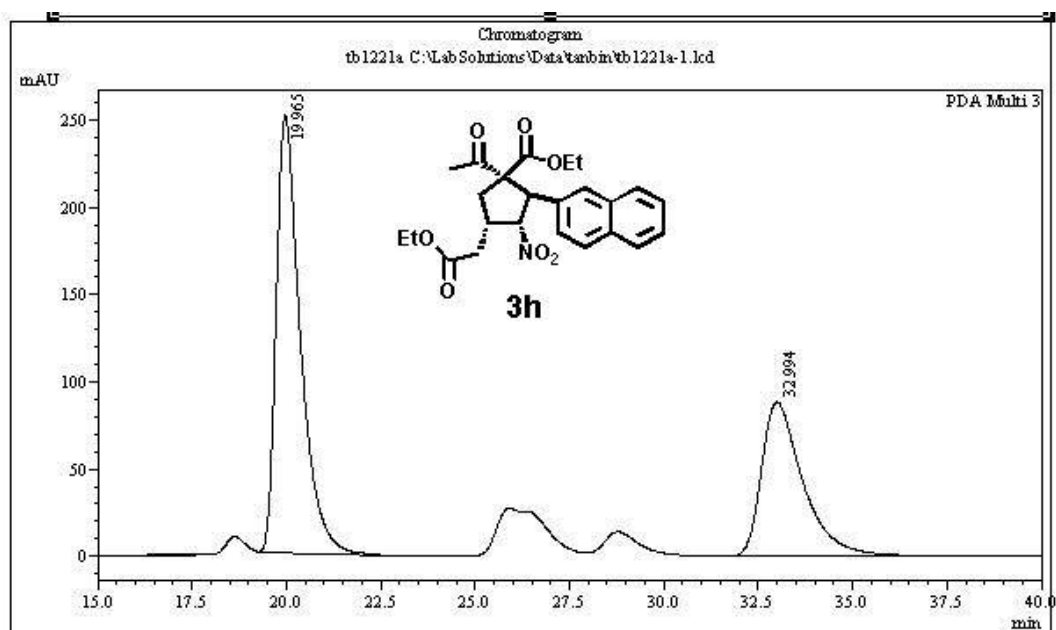

PeakTable

PDA Ch3 254nm 4nm

| Peak# | Ret. Time | Area     | Height | Area %  | Height % |
|-------|-----------|----------|--------|---------|----------|
| 1     | 19.965    | 11170366 | 250515 | 62.705  | 73.954   |
| 2     | 32.994    | 6643774  | 88230  | 37.295  | 26.046   |
| Total |           | 17814140 | 338745 | 100.000 | 100.000  |

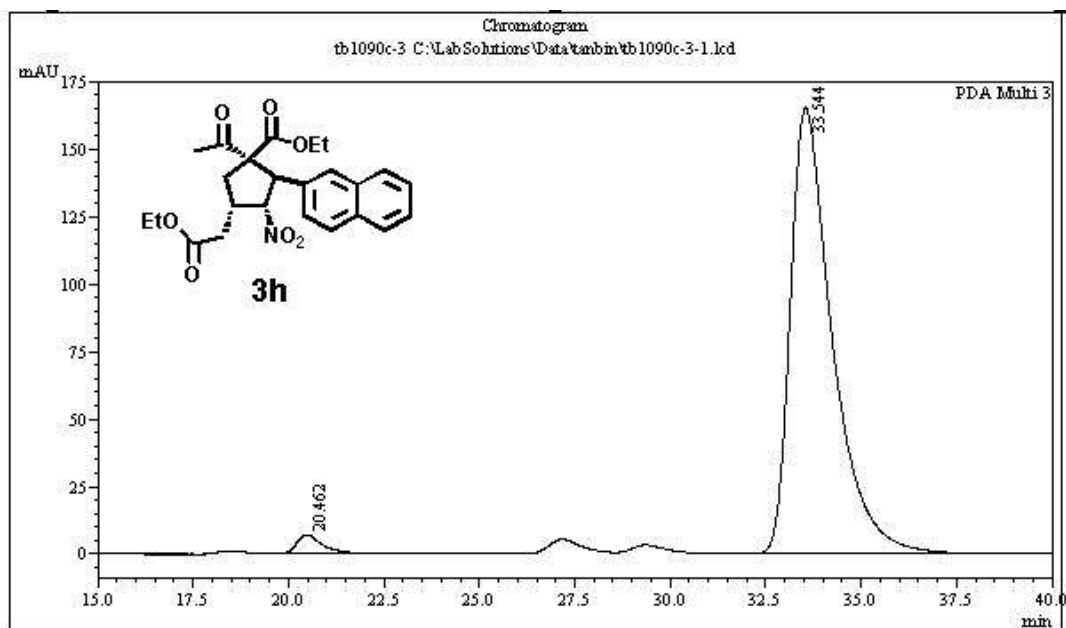

PeakTable

PDA Ch3 254nm 4nm

| Peak# | Ret. Time | Area     | Height | Area %  | Height % |
|-------|-----------|----------|--------|---------|----------|
| 1     | 20.462    | 324277   | 7015   | 2.513   | 4.072    |
| 2     | 33.544    | 12578996 | 165249 | 97.487  | 95.928   |
| Total |           | 12903273 | 172263 | 100.000 | 100.000  |

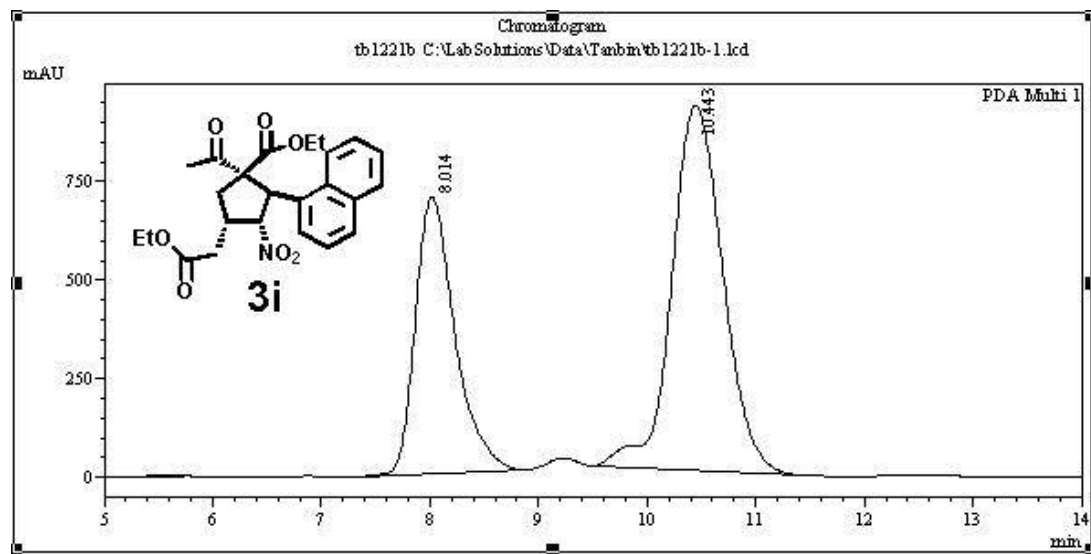

| PeakTable         |           |          |         |         |          |
|-------------------|-----------|----------|---------|---------|----------|
| PDA Ch1 220nm 4nm |           |          |         |         |          |
| Peak#             | Ret. Time | Area     | Height  | Area %  | Height % |
| 1                 | 8.014     | 17761993 | 702468  | 36.908  | 43.166   |
| 2                 | 10.443    | 30363232 | 924894  | 63.092  | 56.834   |
| Total             |           | 48125225 | 1627362 | 100.000 | 100.000  |

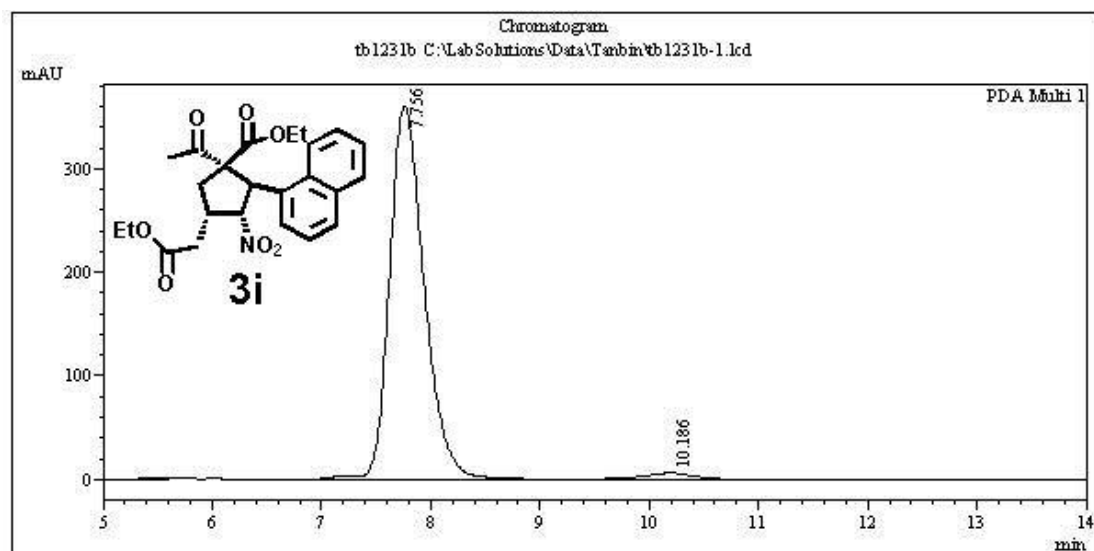

| PeakTable         |           |         |        |         |          |
|-------------------|-----------|---------|--------|---------|----------|
| PDA Ch1 220nm 4nm |           |         |        |         |          |
| Peak#             | Ret. Time | Area    | Height | Area %  | Height % |
| 1                 | 7.756     | 7956596 | 360466 | 97.511  | 98.307   |
| 2                 | 10.186    | 203069  | 6206   | 2.489   | 1.693    |
| Total             |           | 8159664 | 366672 | 100.000 | 100.000  |

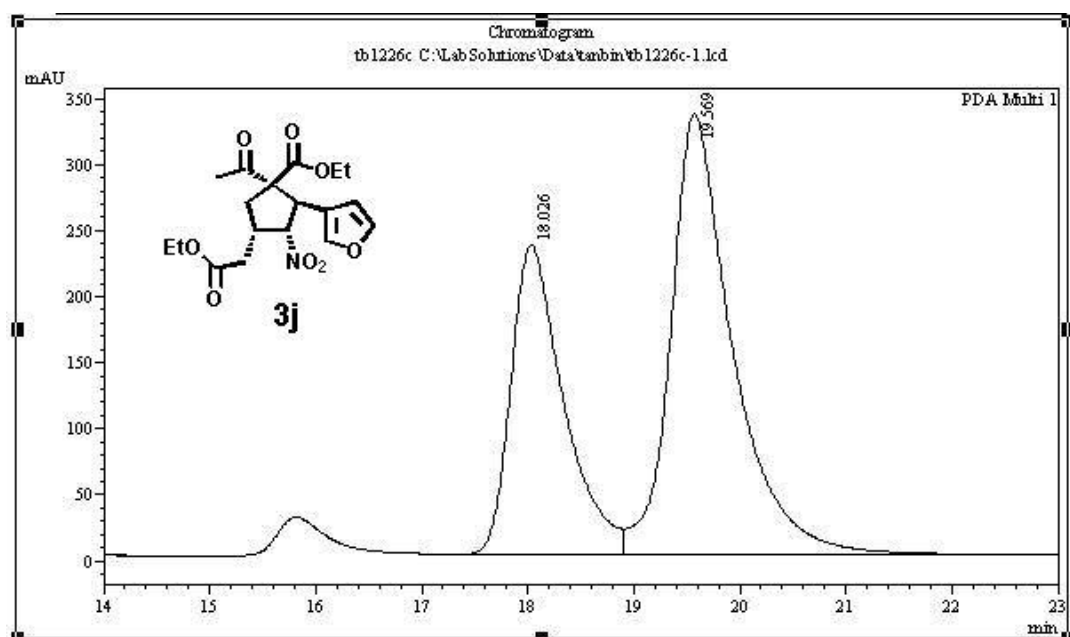

PeakTable

PDA Ch1 210nm 4nm

| Peak# | Ret. Time | Area     | Height | Area %  | Height % |
|-------|-----------|----------|--------|---------|----------|
| 1     | 18.026    | 8059622  | 234060 | 37.515  | 41.281   |
| 2     | 19.569    | 13423997 | 332932 | 62.485  | 58.719   |
| Total |           | 21483619 | 566992 | 100.000 | 100.000  |

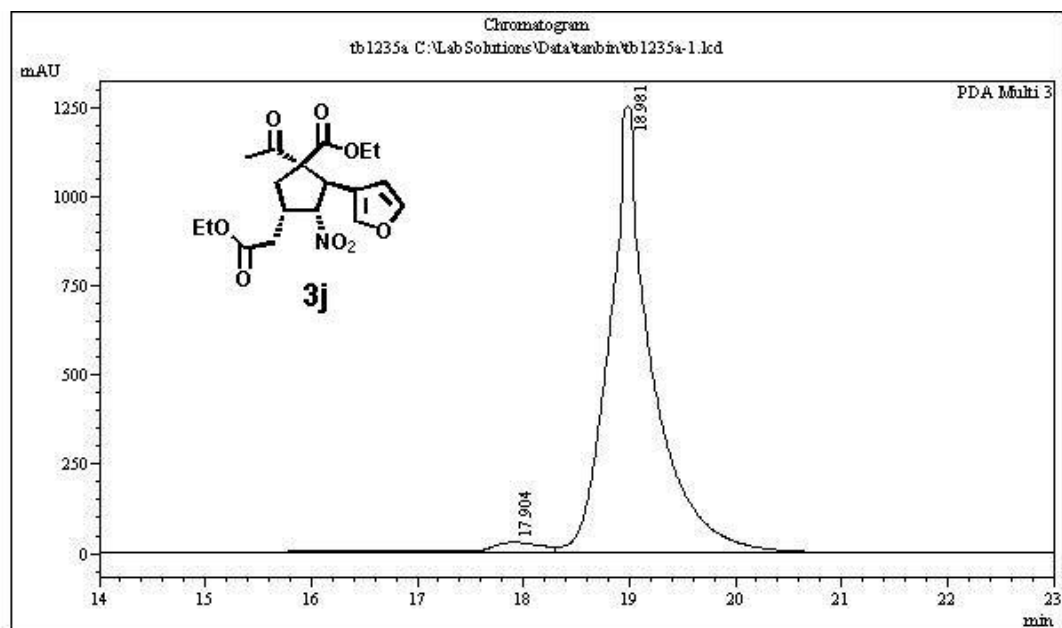

PeakTable

PDA Ch3 254nm 4nm

| Peak# | Ret. Time | Area     | Height  | Area %  | Height % |
|-------|-----------|----------|---------|---------|----------|
| 1     | 17.904    | 1014914  | 30886   | 2.813   | 2.406    |
| 2     | 18.981    | 35069428 | 1252908 | 97.187  | 97.594   |
| Total |           | 36084342 | 1283795 | 100.000 | 100.000  |

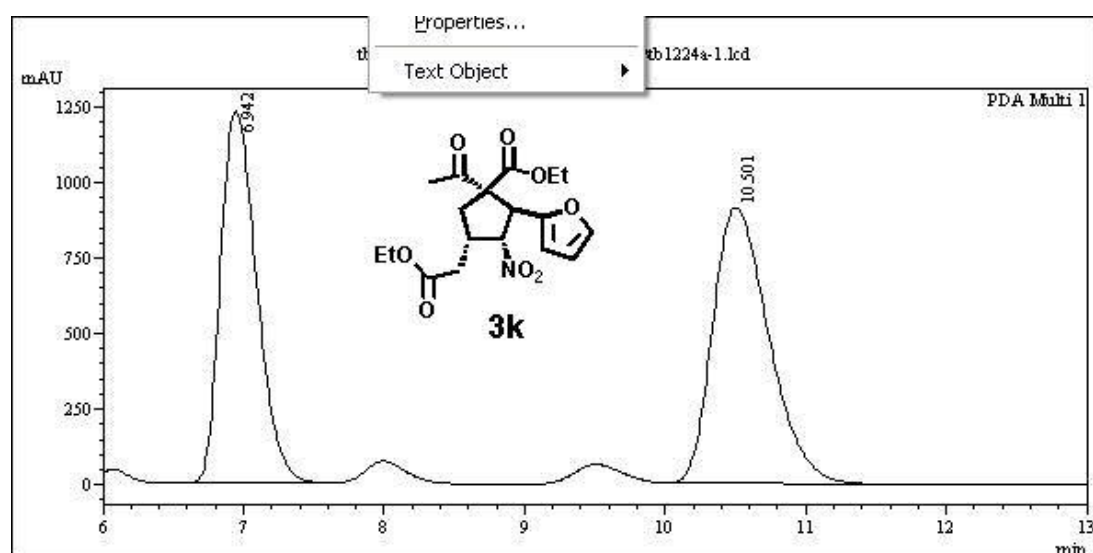

PeakTable

PDA Ch1 220nm 4nm

| Peak# | Ret. Time | Area     | Height  | Area %  | Height % |
|-------|-----------|----------|---------|---------|----------|
| 1     | 6.942     | 21921833 | 1232172 | 46.441  | 57.436   |
| 2     | 10.501    | 25282244 | 913126  | 53.559  | 42.564   |
| Total |           | 47204077 | 2145298 | 100.000 | 100.000  |

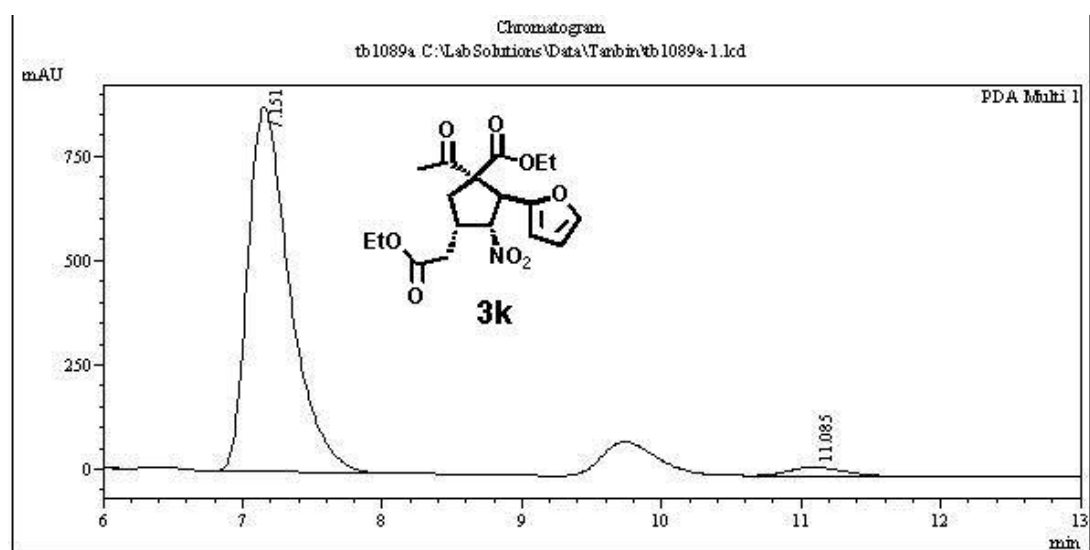

PeakTable

PDA Ch1 220nm 4nm

| Peak# | Ret. Time | Area     | Height | Area %  | Height % |
|-------|-----------|----------|--------|---------|----------|
| 1     | 7.151     | 18297596 | 873762 | 96.908  | 97.638   |
| 2     | 11.085    | 583760   | 21140  | 3.092   | 2.362    |
| Total |           | 18881356 | 894903 | 100.000 | 100.000  |

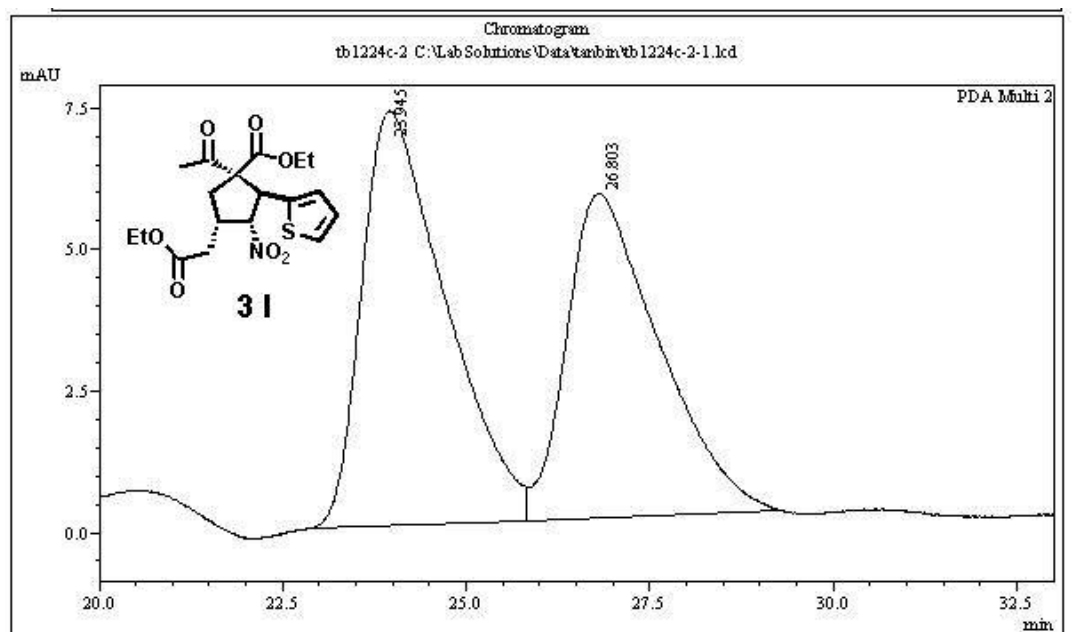

PeakTable

PDA Ch2 230nm 4nm

| Peak# | Ret. Time | Area    | Height | Area %  | Height % |
|-------|-----------|---------|--------|---------|----------|
| 1     | 23.945    | 584190  | 7327   | 53.736  | 56.139   |
| 2     | 26.803    | 502960  | 5724   | 46.264  | 43.861   |
| Total |           | 1087151 | 13051  | 100.000 | 100.000  |

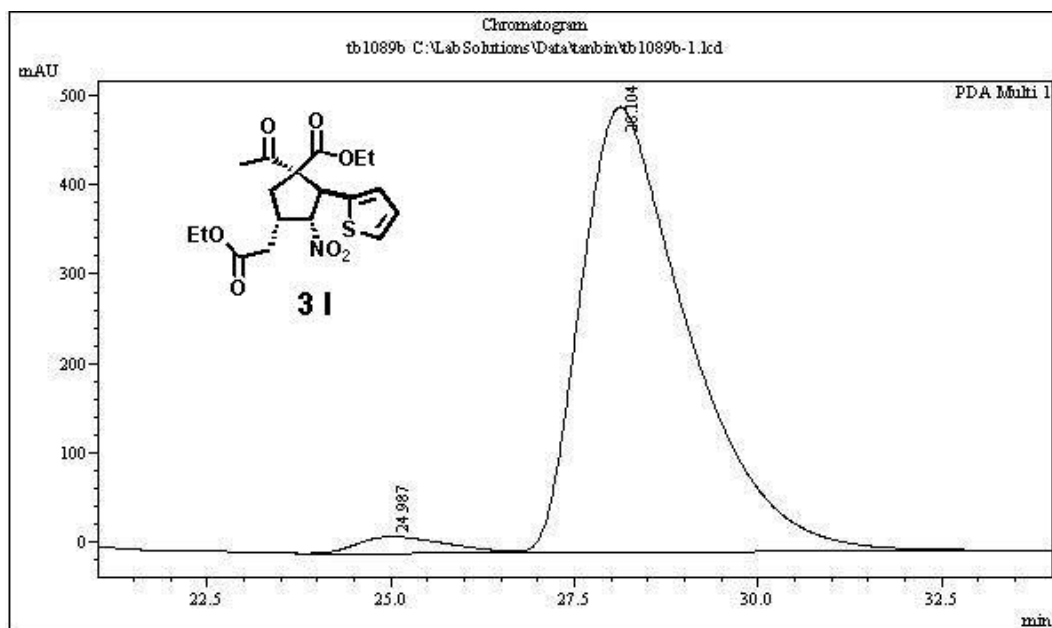

PeakTable

PDA Ch1 210nm 4nm

| Peak# | Ret. Time | Area     | Height | Area %  | Height % |
|-------|-----------|----------|--------|---------|----------|
| 1     | 24.987    | 1517978  | 18395  | 2.917   | 3.562    |
| 2     | 28.104    | 50517843 | 498038 | 97.083  | 96.438   |
| Total |           | 52035822 | 516432 | 100.000 | 100.000  |

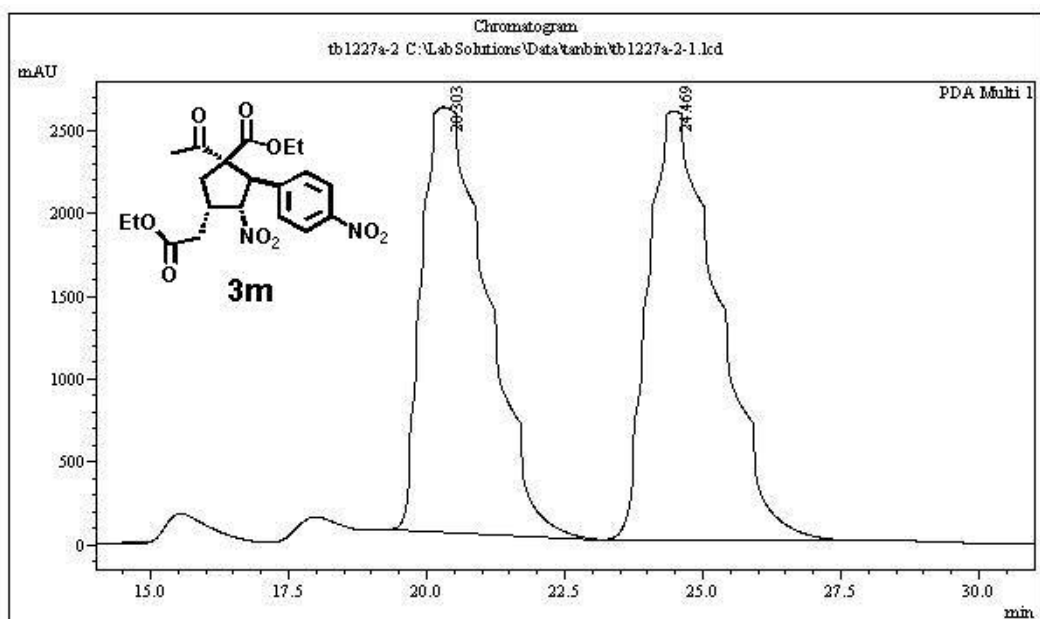

PeakTable

PDA Ch1 210nm 4nm

| Peak# | Ret. Time | Area      | Height  | Area %  | Height % |
|-------|-----------|-----------|---------|---------|----------|
| 1     | 20.303    | 211574144 | 2563444 | 48.119  | 49.774   |
| 2     | 24.469    | 228118982 | 2586764 | 51.881  | 50.226   |
| Total |           | 439693126 | 5150209 | 100.000 | 100.000  |

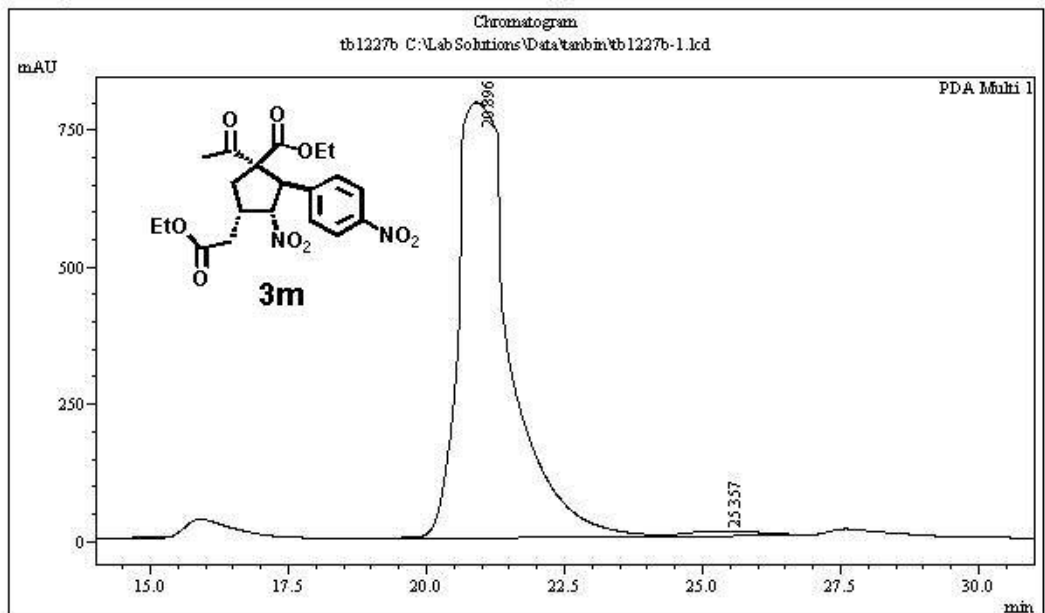

PeakTable

PDA Ch1 210nm 4nm

| Peak# | Ret. Time | Area     | Height | Area %  | Height % |
|-------|-----------|----------|--------|---------|----------|
| 1     | 20.896    | 53116048 | 793869 | 98.525  | 98.937   |
| 2     | 25.357    | 795452   | 8526   | 1.475   | 1.063    |
| Total |           | 53911500 | 802395 | 100.000 | 100.000  |



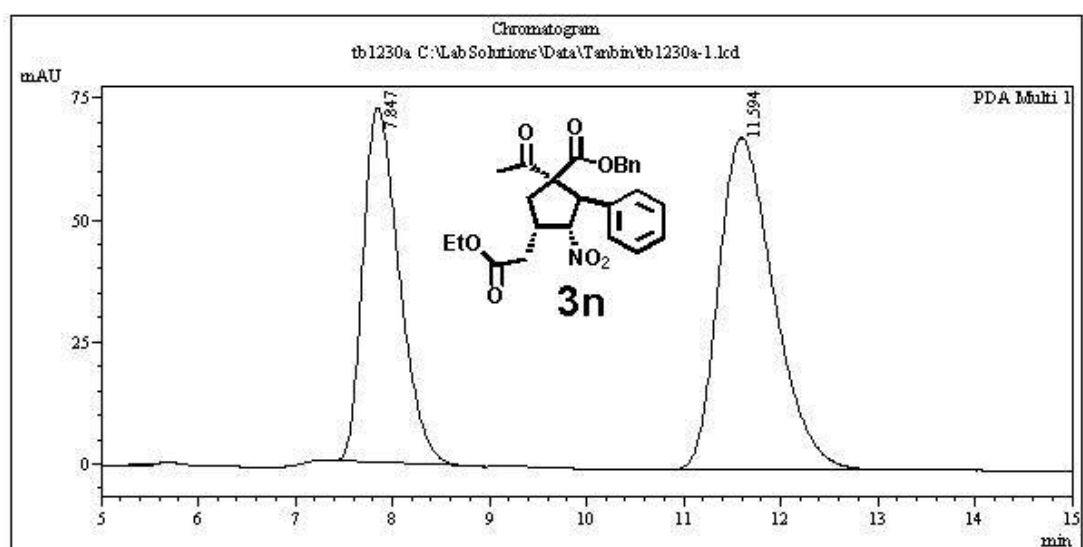

PeakTable

PDA Ch1 220nm 4nm

| Peak# | Ret. Time | Area    | Height | Area %  | Height % |
|-------|-----------|---------|--------|---------|----------|
| 1     | 7.847     | 1881105 | 72600  | 41.190  | 51.635   |
| 2     | 11.594    | 2685778 | 68002  | 58.810  | 48.365   |
| Total |           | 4566883 | 140602 | 100.000 | 100.000  |

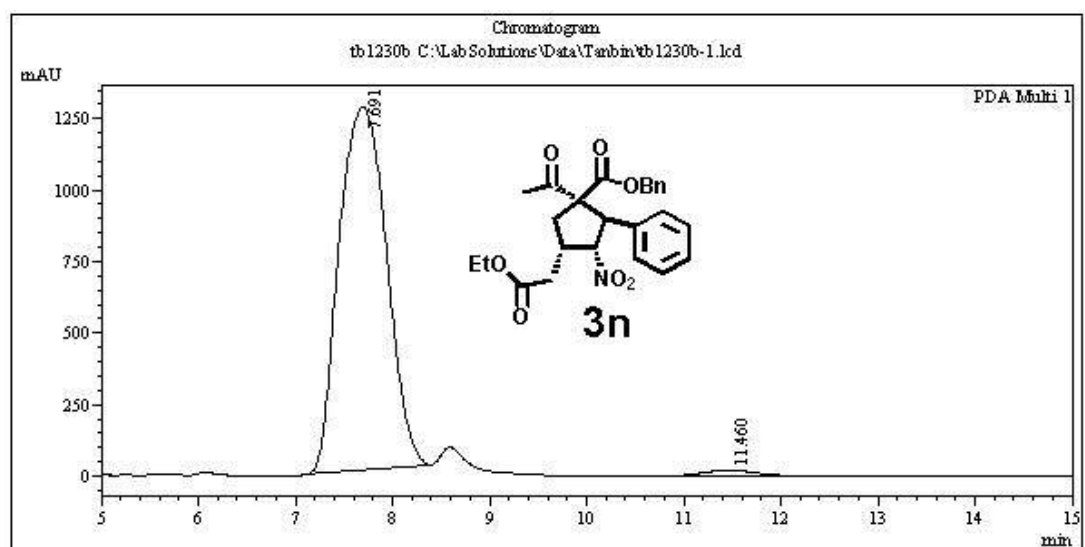

PeakTable

PDA Ch1 220nm 4nm

| Peak# | Ret. Time | Area     | Height  | Area %  | Height % |
|-------|-----------|----------|---------|---------|----------|
| 1     | 7.691     | 43264341 | 1271194 | 98.282  | 98.446   |
| 2     | 11.460    | 756084   | 20068   | 1.718   | 1.554    |
| Total |           | 44020425 | 1291262 | 100.000 | 100.000  |

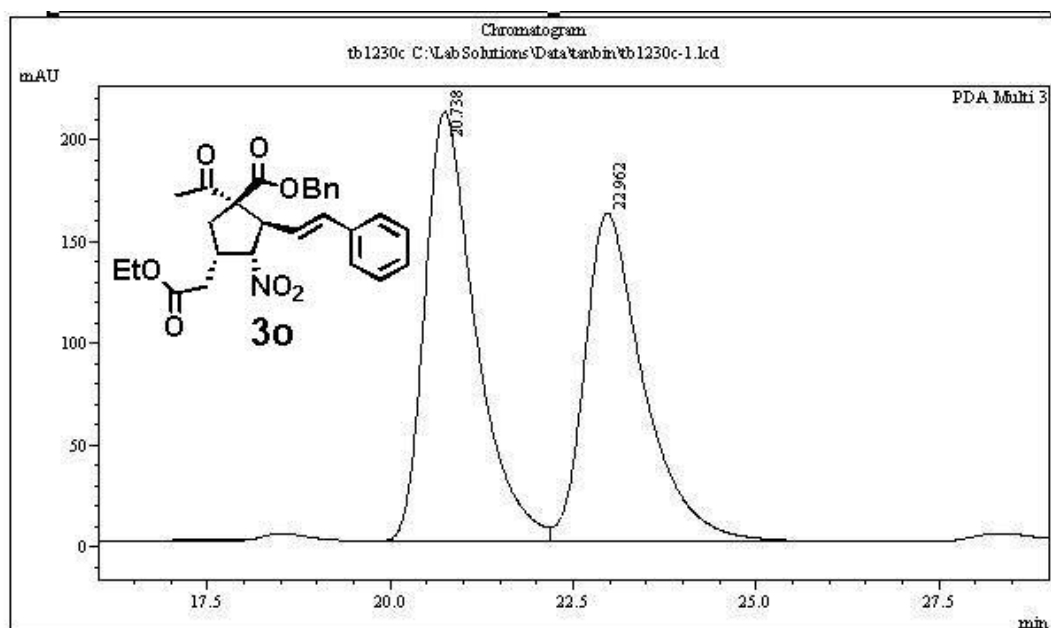

PeakTable

PDA Ch3 254nm 4nm

| Peak# | Ret. Time | Area     | Height | Area %  | Height % |
|-------|-----------|----------|--------|---------|----------|
| 1     | 20.738    | 10170695 | 210859 | 52.952  | 56.656   |
| 2     | 22.962    | 9036698  | 161313 | 47.048  | 43.344   |
| Total |           | 19207393 | 372172 | 100.000 | 100.000  |

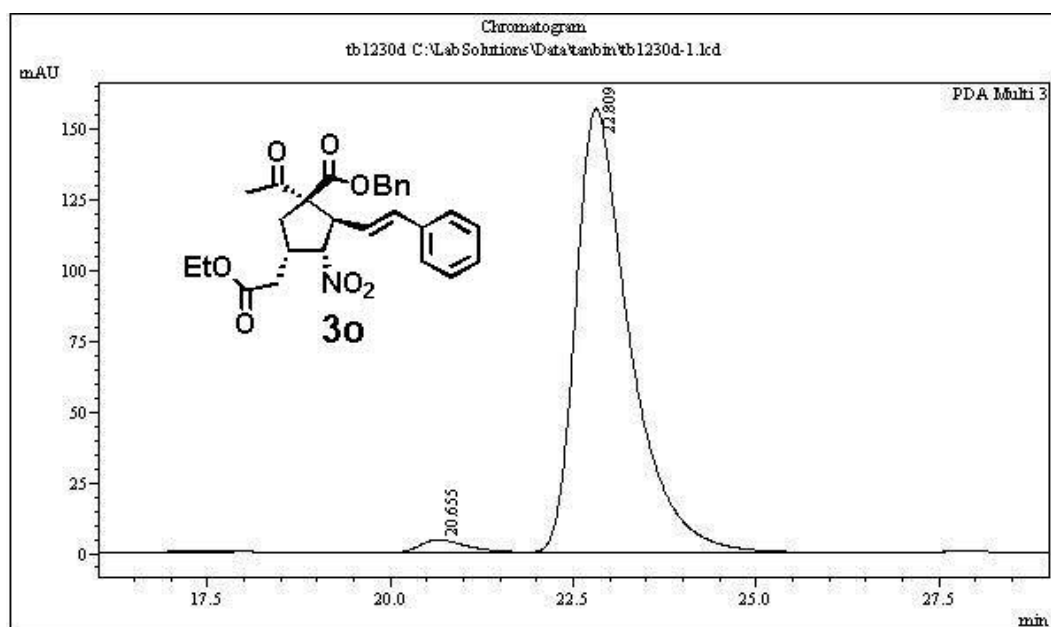

PeakTable

PDA Ch3 254nm 4nm

| Peak# | Ret. Time | Area    | Height | Area %  | Height % |
|-------|-----------|---------|--------|---------|----------|
| 1     | 20.655    | 196569  | 4549   | 2.386   | 2.819    |
| 2     | 22.809    | 8040203 | 156827 | 97.614  | 97.181   |
| Total |           | 8236772 | 161376 | 100.000 | 100.000  |
